# Supplementary material for: Single cell transcriptomics shows that malaria promotes unique regulatory responses across multiple immune cell subsets
Source: PubMed Central journal article supplement (PMC10651914; doi:10.1038/s41467-023-43181-7), 2023-11-15
Supplement: 41467_2023_43181_MOESM1_ESM.pdf [file 41467_2023_43181_MOESM1_ESM.pdf]

# Supplementary Materials

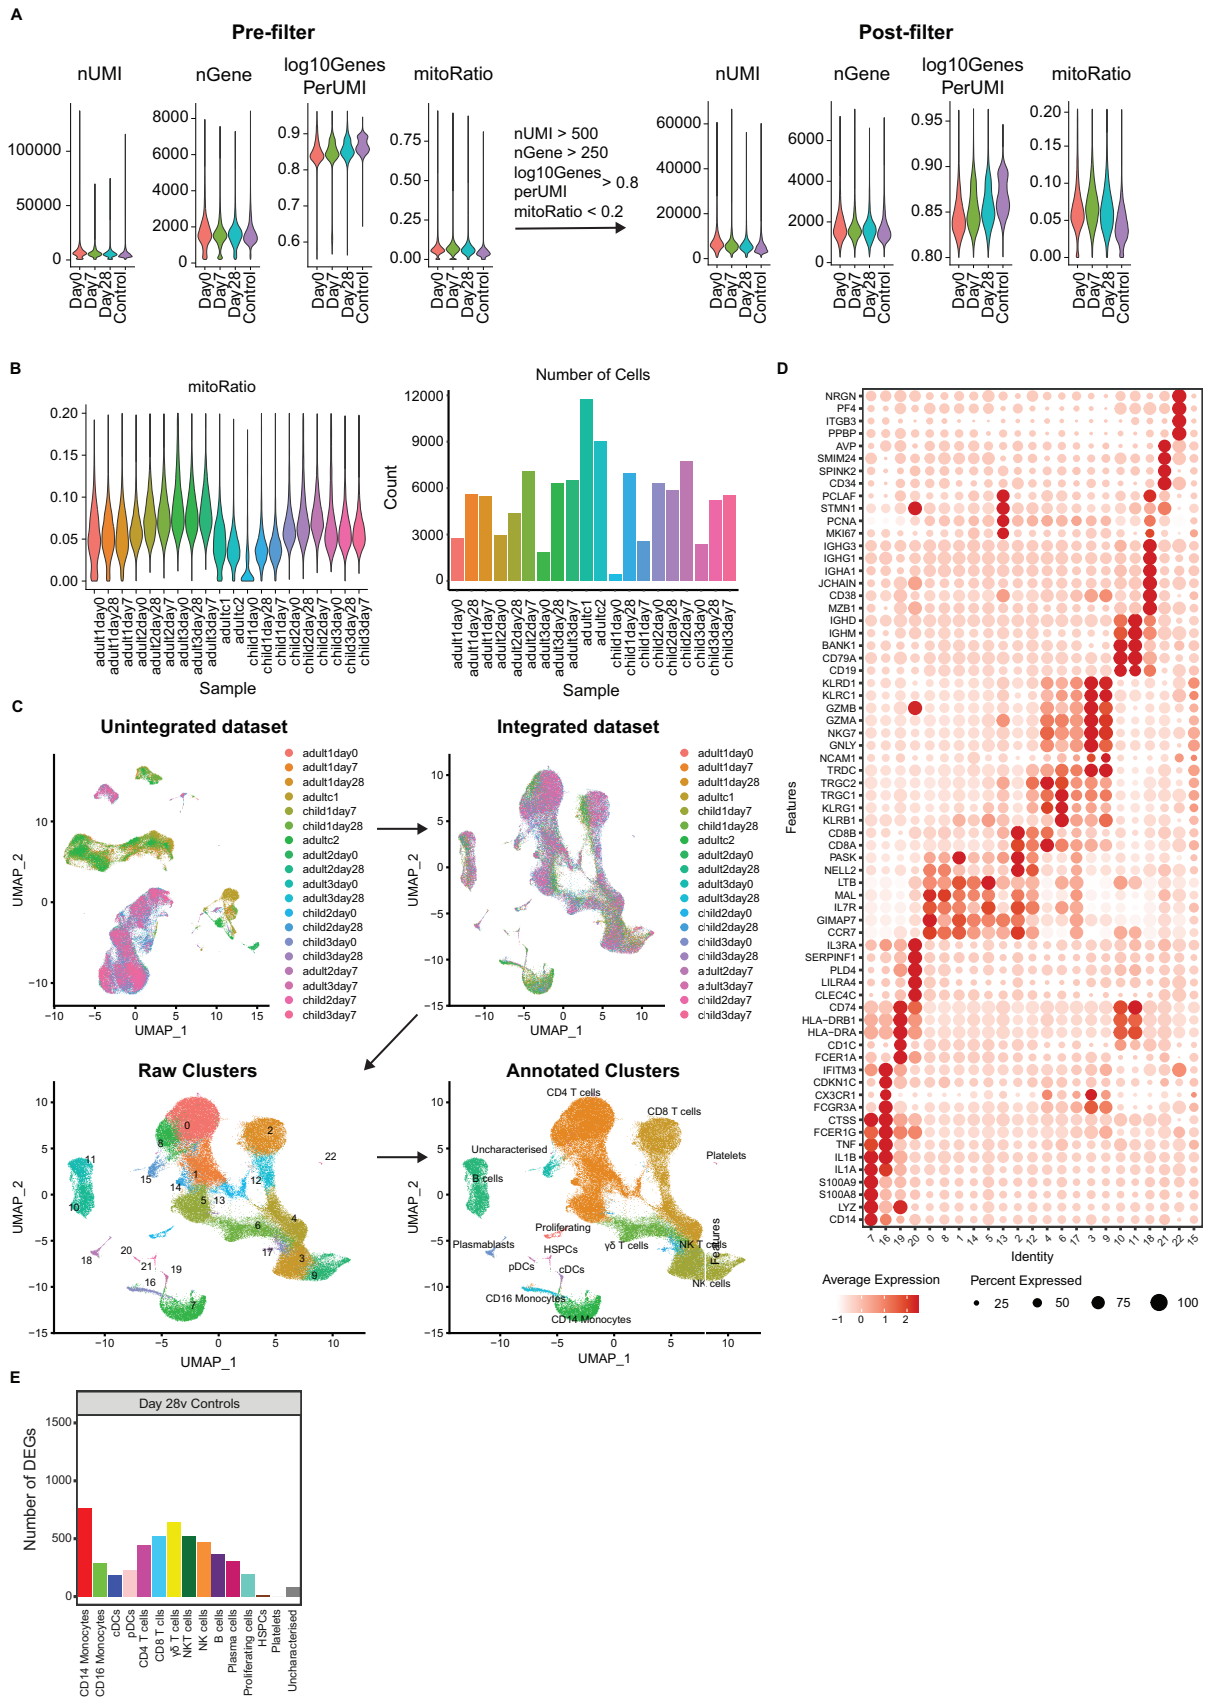

Supplementary Fig. 1: scRNAseq pre-processing QC. (A) Pre- and post-filter violin plots of nUMI

(transcript counts per cell), nGene (gene counts per cell), log10GenesPerUMI, mitoRatio (percentage of mitochondrial genes per cell). Cells removed based on filters nUMI > 500, nGene >250, log10GenesPerUMI >0.8, mitoRatio < 0.2. **(B)** Violin plot of mitoRatio bar plot of cell counts from each sample to justify removal of sample “child1day0”. **(C)** Workflow of integration and annotation of Seurat cluster by UMAP visualisation. UMAPs of coloured by sample pre- and post-integration by sample. Integrated UMAP of cluster distribution and numbering based on Seurat default shared nearest neighbour (SNN) clustering algorithm at a resolution of 0.6. Annotated cluster UMAP to define cell subset, based on **(D)** expression of canonical genes in dot plot (See also Fig. 1B). **(E)** Number of DEGs per annotated cell subset comparing malaria patients 28 days post-treatment and endemic healthy controls. Analysis performed by and graphs generated with Seurat v4.

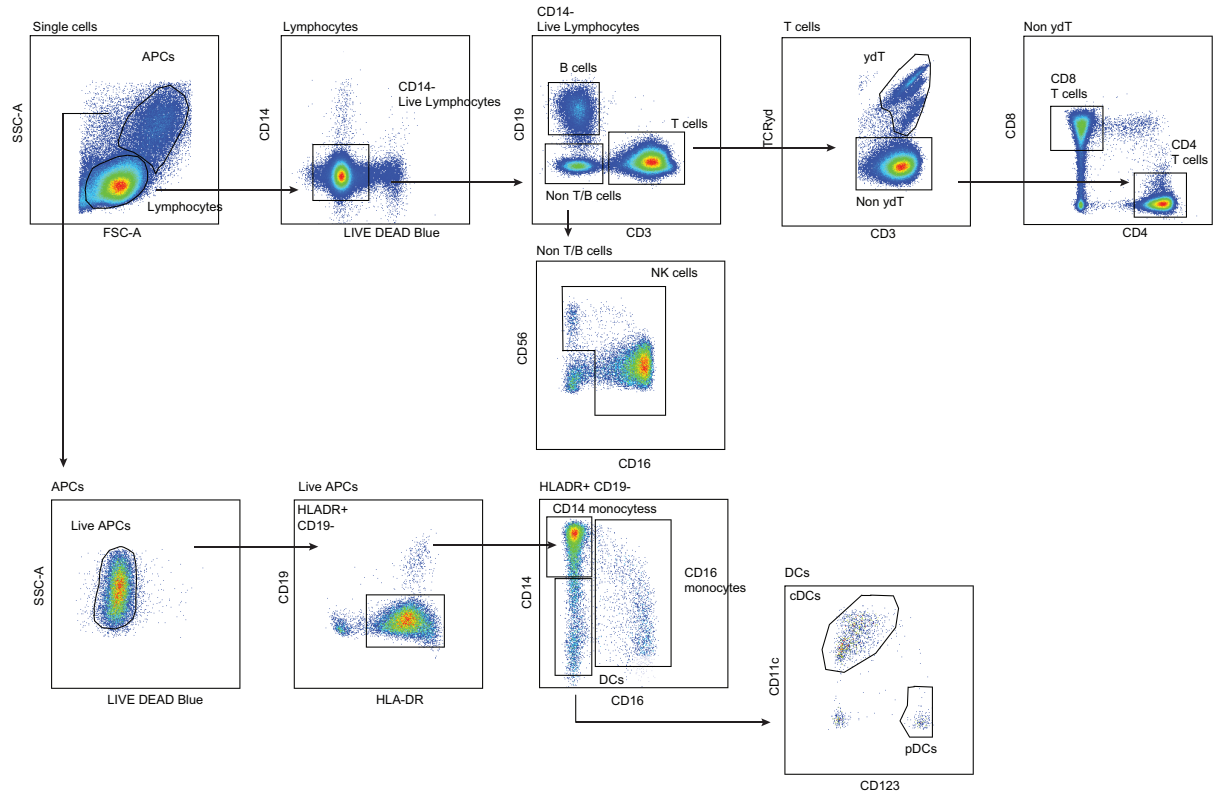

**Supplementary Fig. 2: Gating strategy of Flow cytometric cell phenotyping comparison of scRNAseq samples.** Peripheral blood mononuclear (PBMCs) from each individual analysed for scRNAseq were analysed by flow cytometry to identify major cell subsets. Gating strategy is outlined.

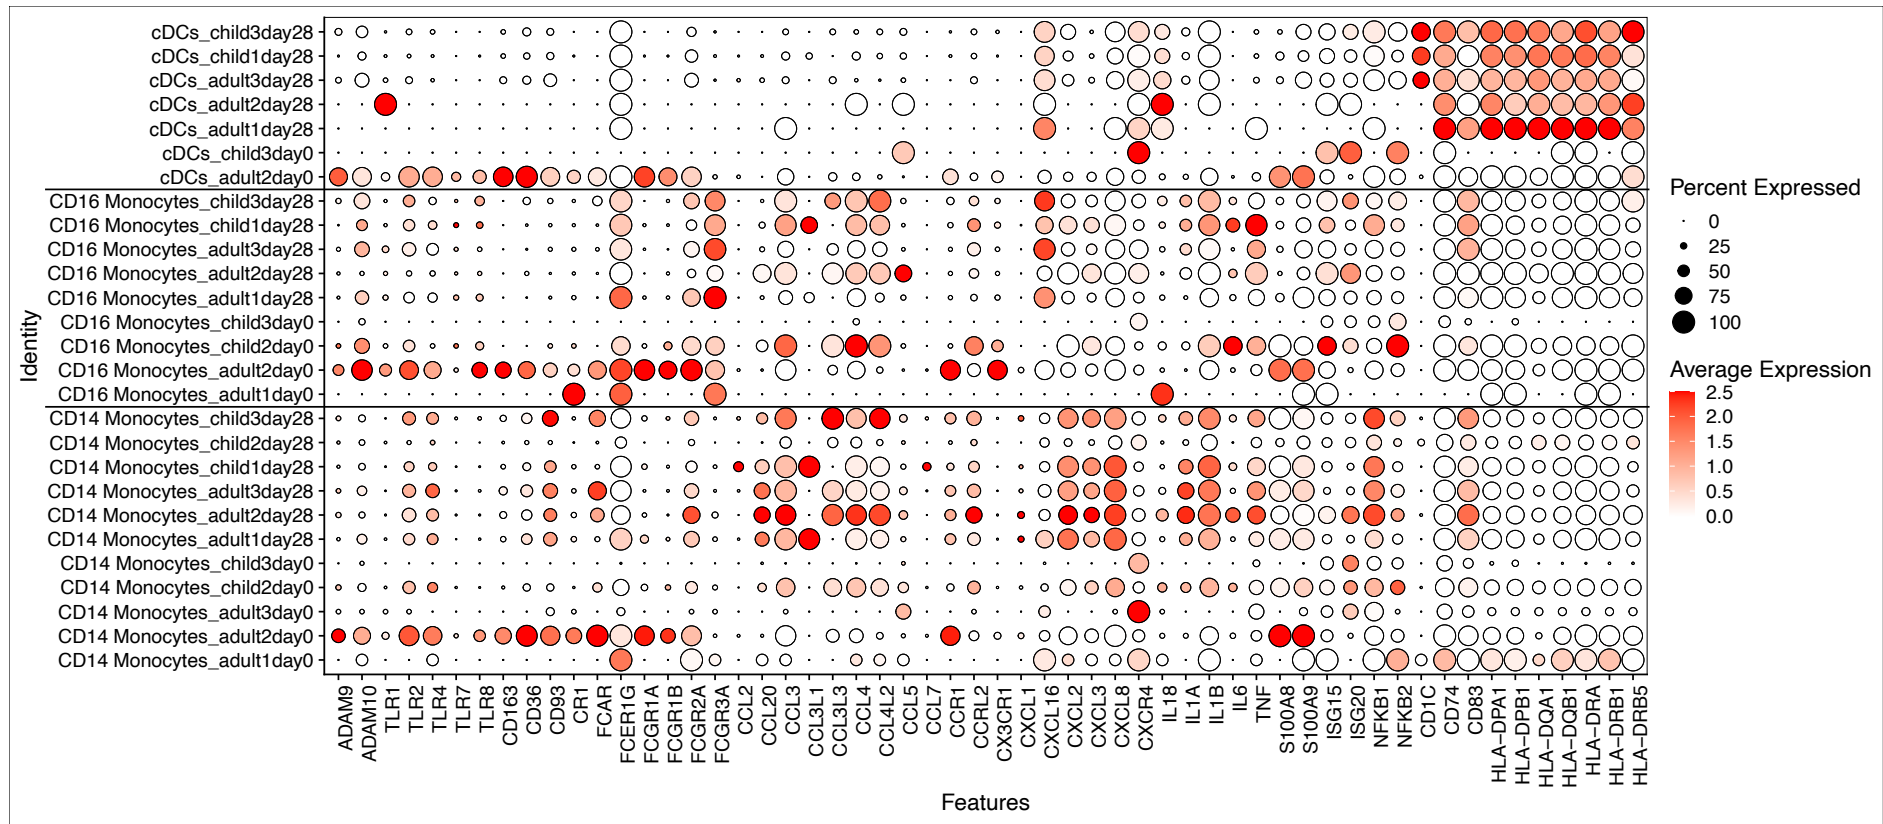

**Supplementary Fig. 3: Myeloid cell malaria driven differential expressed genes as average expression of each donor at day 0 and day 28.** Average expression of DEGs identified during malaria in monocytes and cDCs shown as average expression on individual level at day 0 and day 28 timepoints.



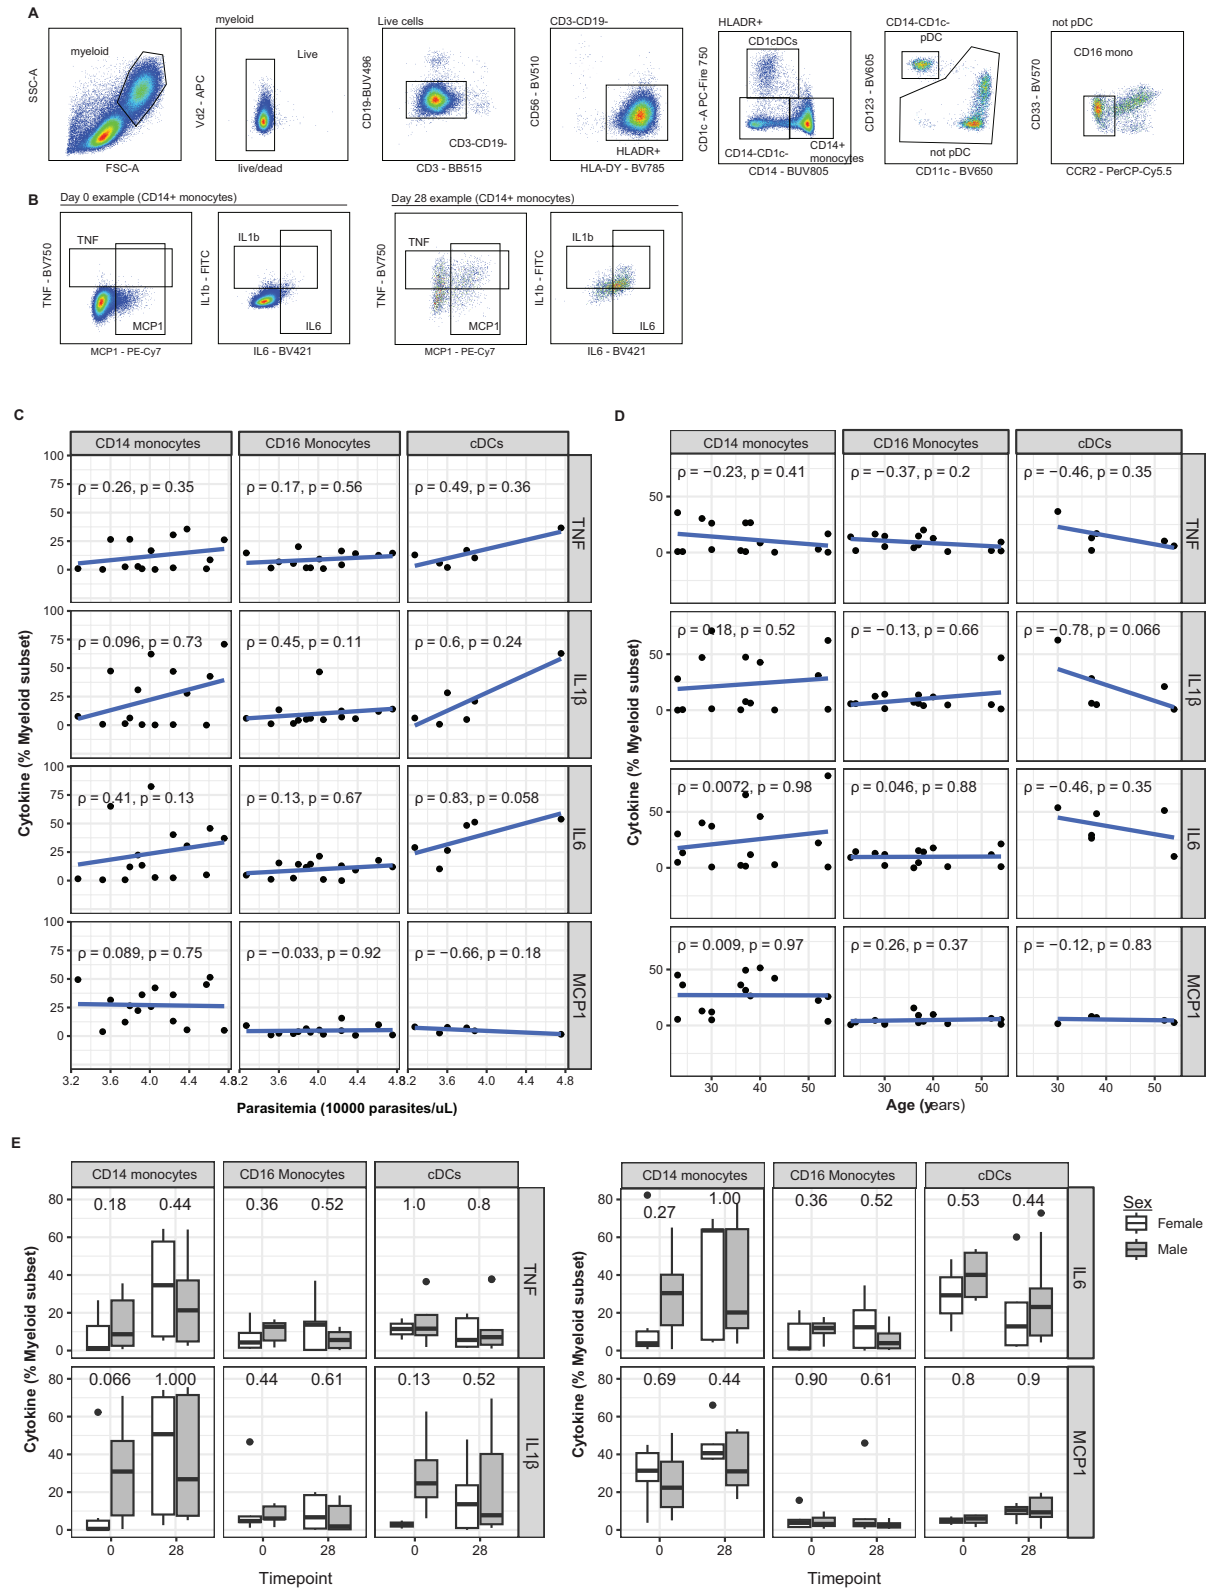

**Supplementary Fig. 4: Myeloid cell subset *ex vivo* cytokine production analysis.** To investigate key changes to myeloid cell cytokine production, PBMCs from patients with malaria (day 0) and 28 days post treatment were rested *ex vivo* for 4 hours and cytokine captured by addition of Monensin then

measured by flow cytometry. **(A)** Gating strategy to identify CD14<sup>+</sup> monocytes, CD16<sup>+</sup> monocytes and CD1c<sup>+</sup> DCs. Due to the down regulation of CD16 in culture cells, alternative gating strategy as HLA-DR<sup>+</sup>/CD1c<sup>-</sup>/CD14<sup>+</sup>/CD123<sup>-</sup>/CCR2<sup>-</sup>/CD33<sup>-</sup> was used. **(B)** Representative FACS gating of TNF, MCP1, IL6, IL1 $\beta$  expression from CD14 monocytes at day 0 and day 28. Frequency of cytokine positive CD14<sup>+</sup> monocytes, CD16<sup>+</sup> monocytes and CD1c<sup>+</sup> DCs linear association with **(C)** *Plasmodium falciparum* parasitemia (10000 parasites/ $\mu$ L) and **(D)** age (years). Scatterplot line performed by linear regression, Spearman's rank correlation. **(E)** Frequency of cytokine positive CD14<sup>+</sup> monocytes, CD16<sup>+</sup> monocytes and CD1c<sup>+</sup> DCs at day 0 and day 28 compared between sexes. Box plots show the median and IQR of volunteers, group comparisons performed by Mann Whitney U test.

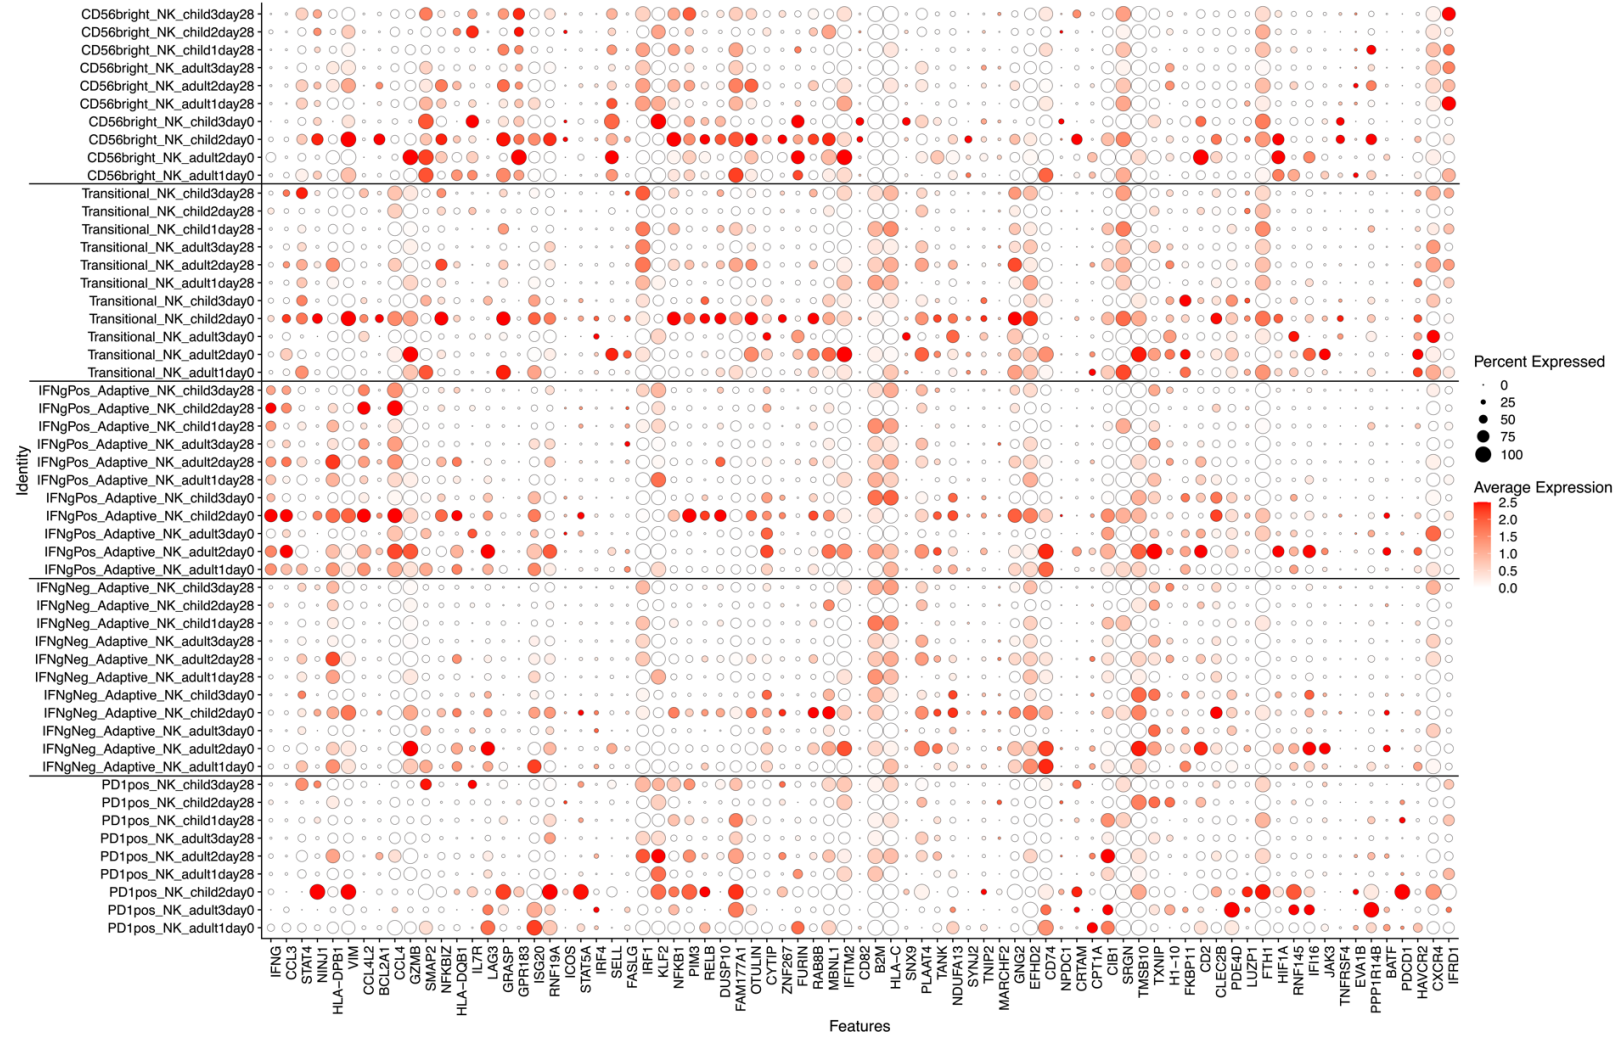

**Supplementary Fig. 5: Malaria driven differential expressed genes in NK cell subsets as average expression of each donor at day 0 and day 28. Average expression level (white to red) and percentage of expression (dot size) in cell population of genes in the individual at day 0 and day 28 from each cell cluster.**

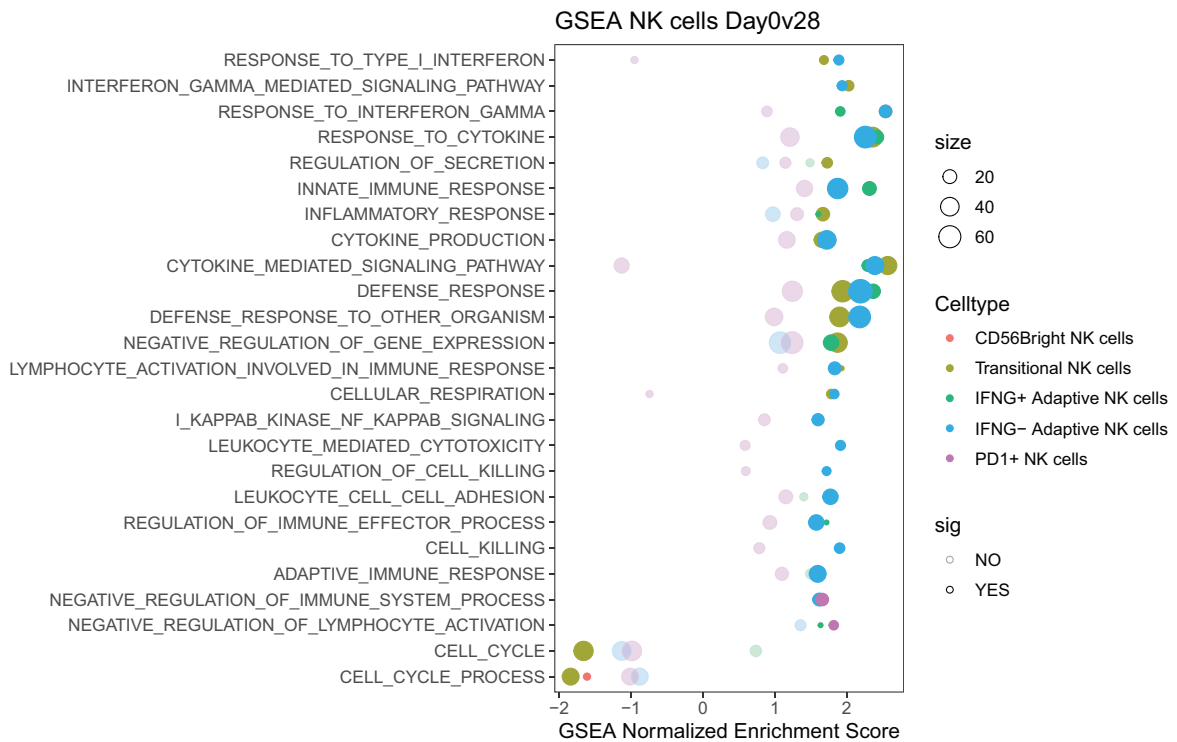

**Supplementary Fig. 6: GSEA of DEGs from NK cell subsets.** Differentially expressed genes (DEGs) identified between day 0 ( $n=5$ ) and day 28 ( $n=6$ ) for each NK cell subset were analysed using GSEA publicly available software (<https://www.gsea-msigdb.org/gsea/index.jsp>). Enriched signatures for each subset indicated.

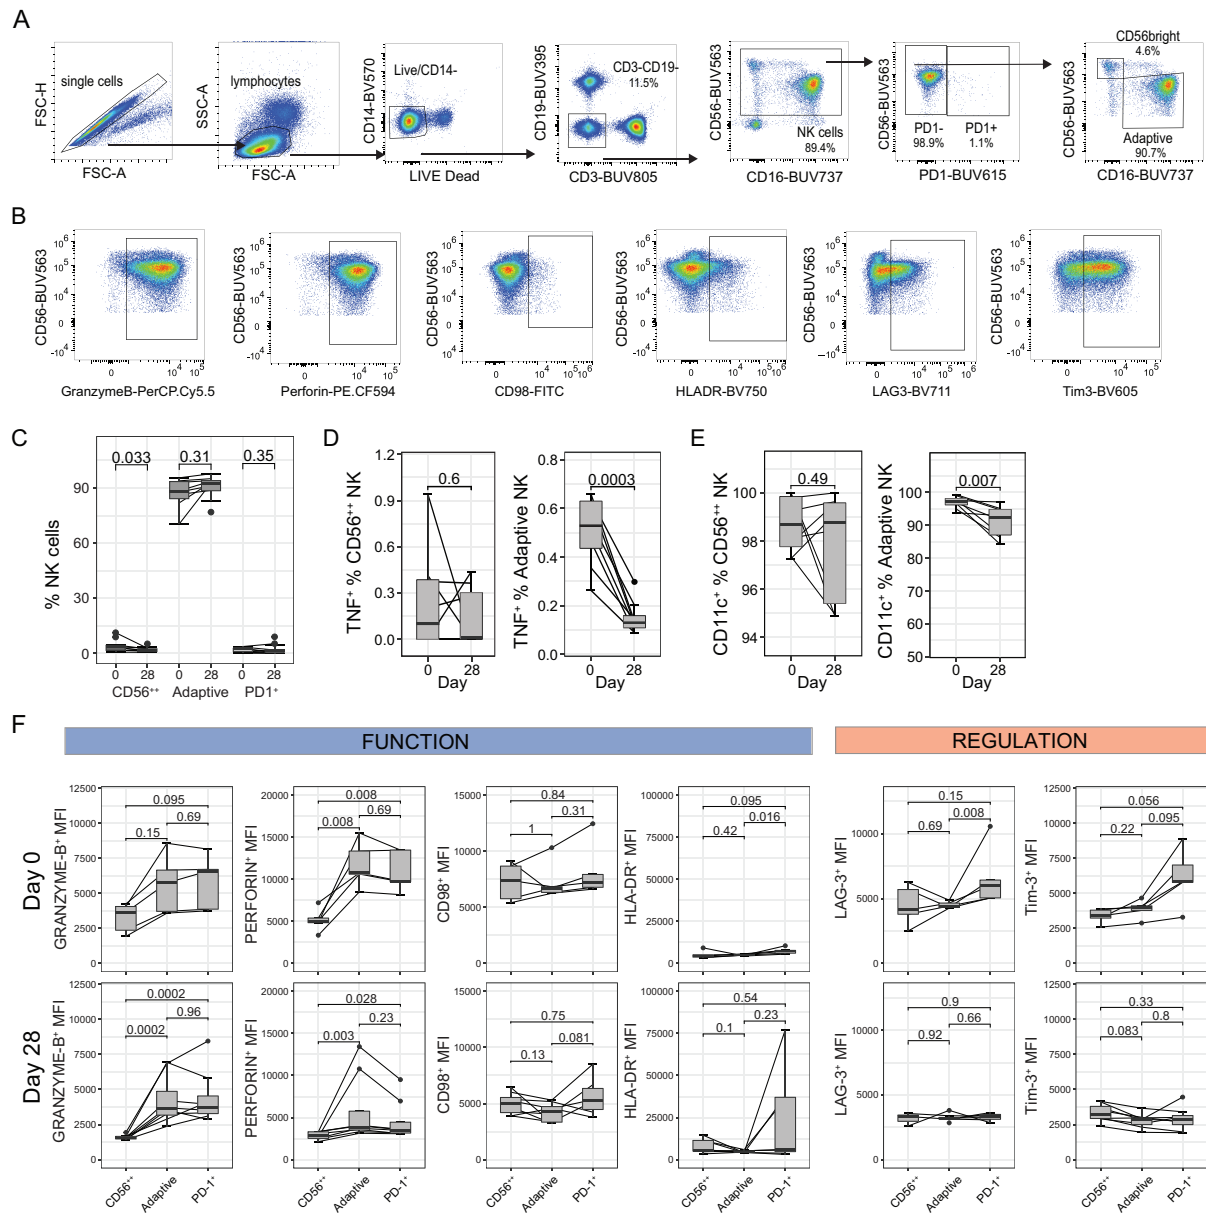

**Supplementary Fig. 7: Flow cytometric analysis of NK cells.** PBMCs from individuals with acute *Plasmodium falciparum* infection (day 0,  $n=11$ ) and 28-days post-infection (day 28,  $n=17$ ), were analysed *ex vivo* to identify NK cell protein expression of DEGs. **(A)** Gating strategy to identify PD1<sup>+</sup>, CD56<sup>bright</sup> (CD56<sup>+</sup>) and Adaptive NK subsets. **(B)** Representative FACS gating of Granzyme-B, Perforin, CD98, ICOS, HLA-DR, LAG-3 and TIM-3 against CD56 expression at day 0 in total NK population. **(C)** Proportion of NK cell subsets at day 0 ( $n=11$ ) and day 28 ( $n=17$ ). Expression of **(D)** TNF and **(E)** CD11c expression by CD56<sup>+</sup> and Adaptive NK cells at day 0 ( $n=8$ ) and day 28 ( $n=8$ ). **(F)** Mean fluorescence intensity (MFI) of Granzyme-B<sup>+</sup>, Perforin<sup>+</sup>, CD98<sup>+</sup>, HLA-DR<sup>+</sup>, LAG-3<sup>+</sup> or Tim-3<sup>+</sup> events in CD56<sup>+</sup>, Adaptive and PD1<sup>+</sup> NK cell populations at day 0 and day 28 ( $n=5$  day 0,  $n=8$  day 28). **(G)** For all data, box plots show the median and IQR of volunteers, lines represent paired

observations, group comparisons performed by Mann Whitney U test and paired group comparisons performed by Wilcoxon signed rank test.

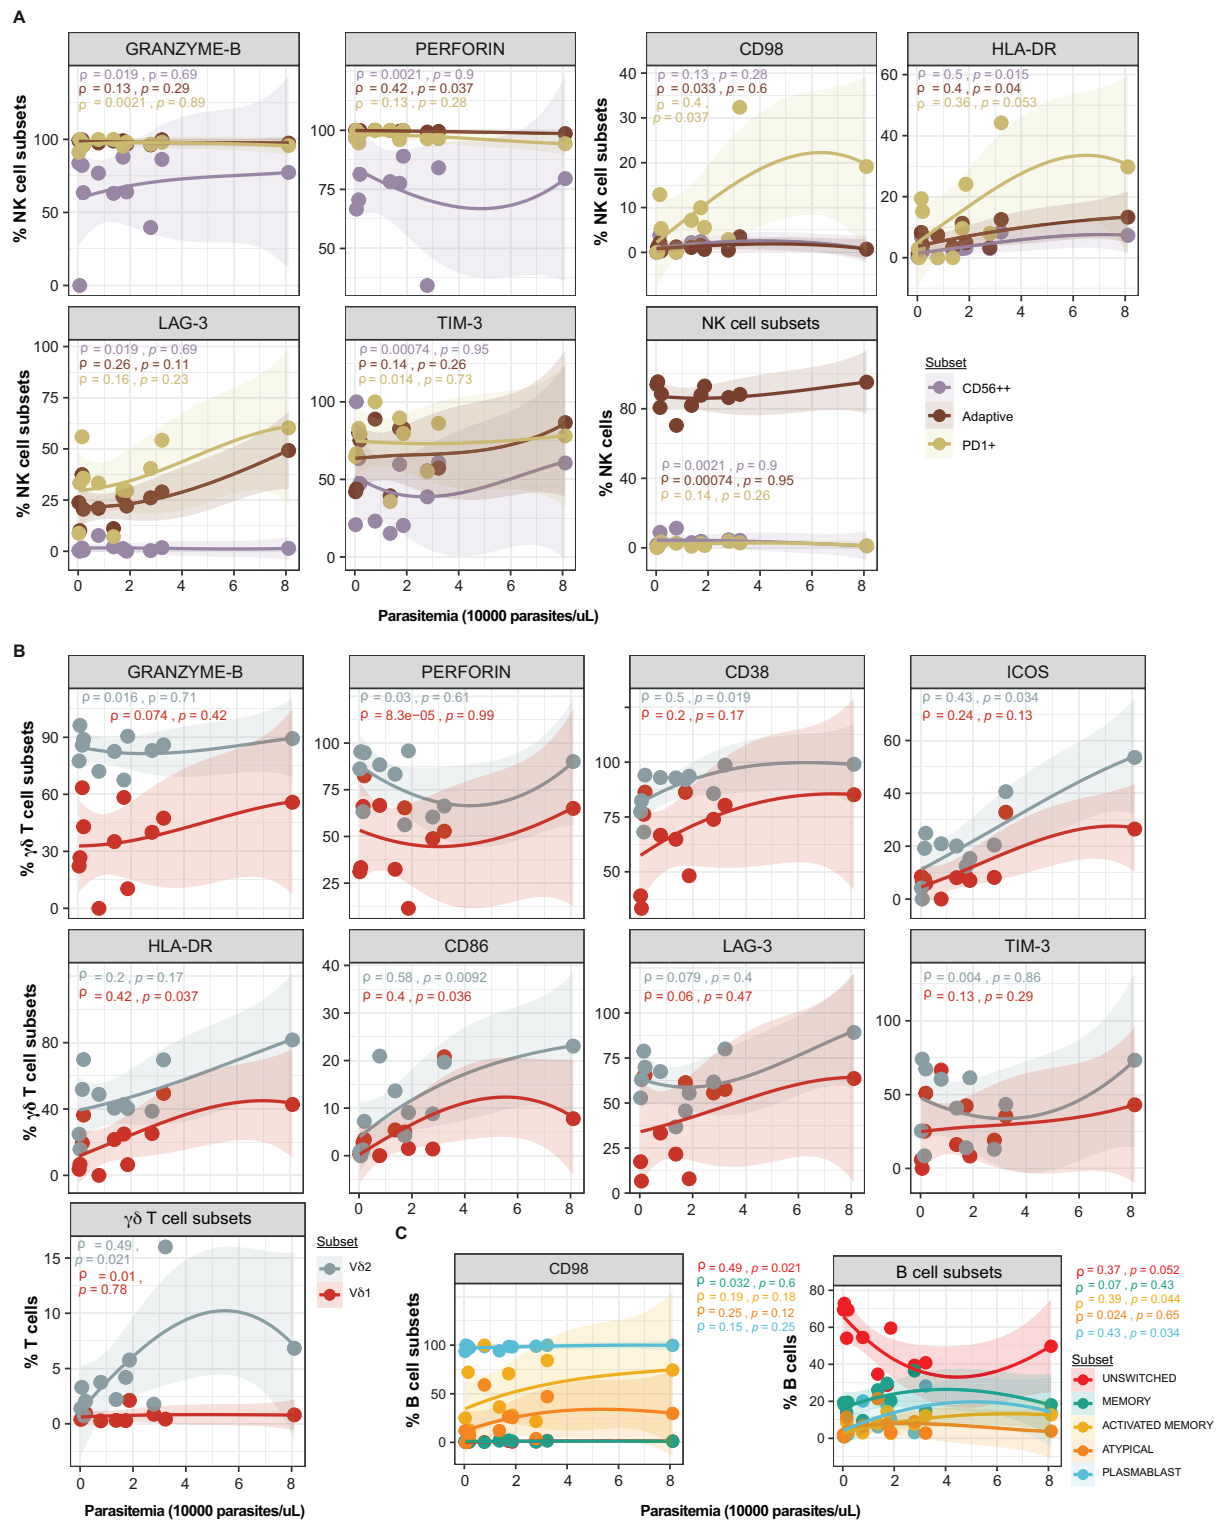

**Supplementary Fig. 8: Association of blood parasitemia with lymphocyte *ex vivo* phenotypes and frequencies.** PBMCs from individuals with acute *Plasmodium falciparum* infection (day 0,  $n=11$ ) were analysed *ex vivo*. Cell frequencies and marker expression by (A) NK, (B)  $\gamma\delta$  T and (C) B cells associated with *Plasmodium falciparum* parasitemia (10000 parasites/ $\mu$ L). Scatterplot line performed by Loess regression, Spearman's rank correlation.

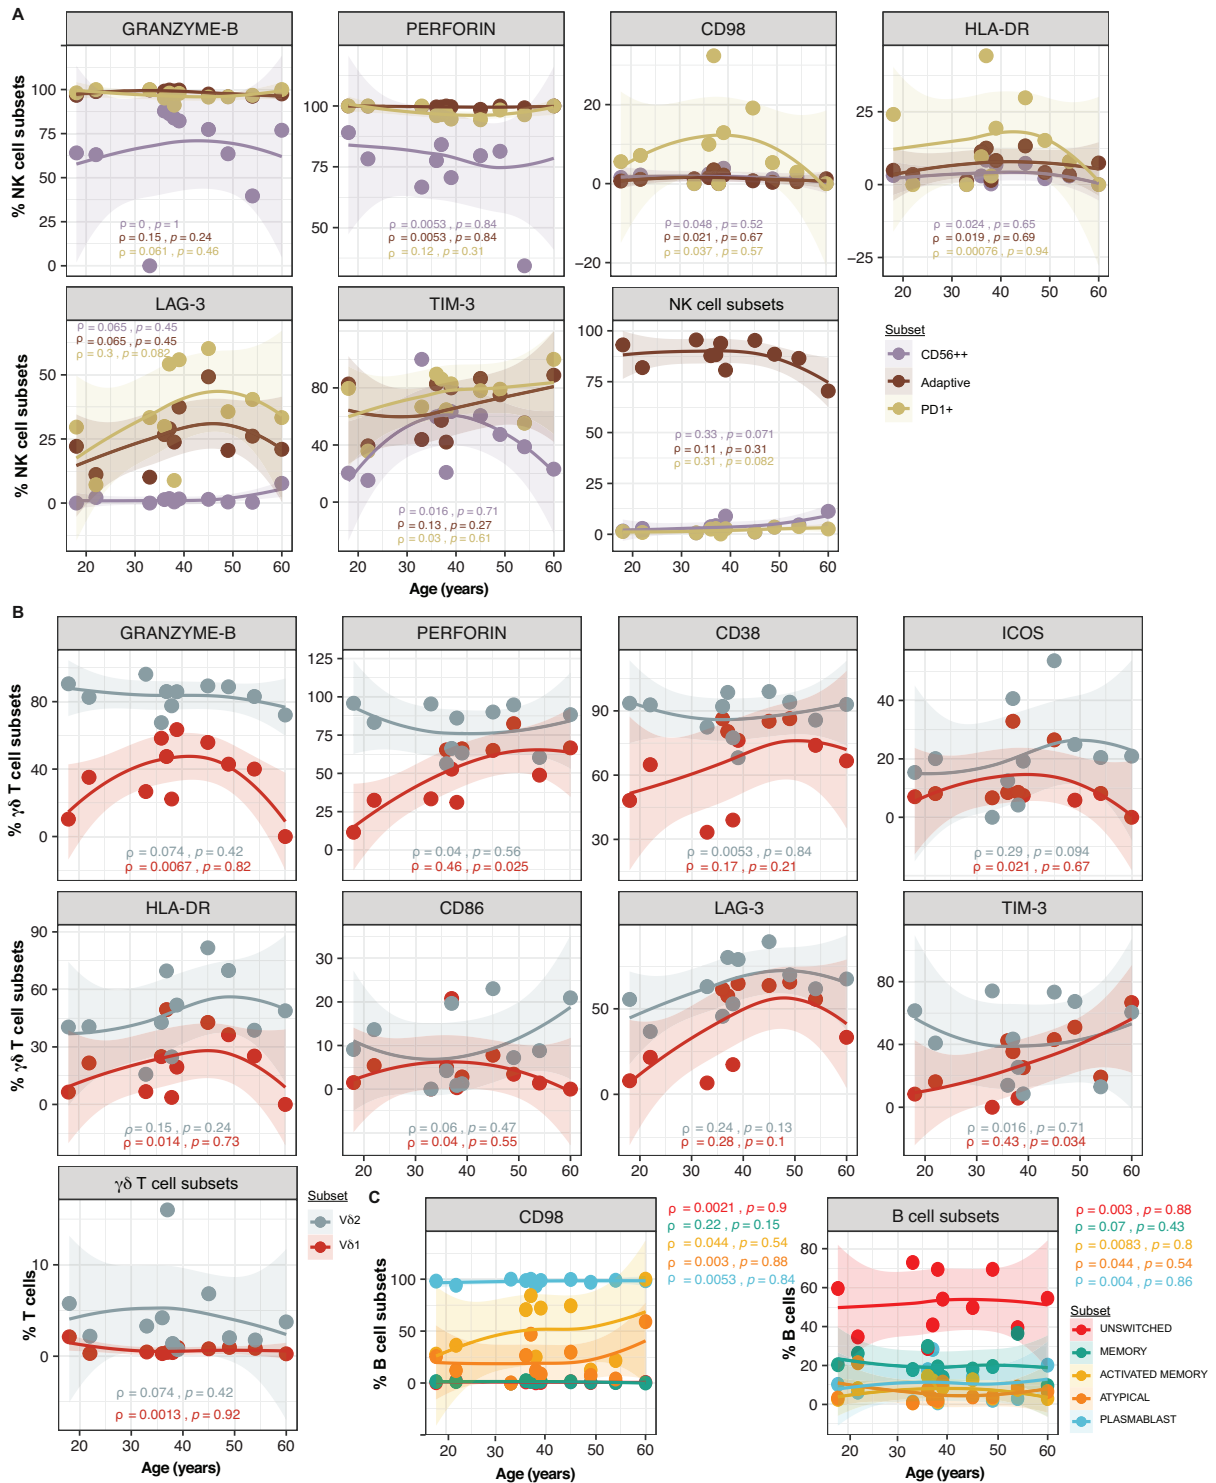

**Supplementary Fig. 9: Association of age with lymphocyte *ex vivo* phenotypes and frequencies.**

PBMCs from individuals with acute *Plasmodium falciparum* infection (day 0,  $n=11$ ) were analysed *ex vivo*. Cell frequencies and marker expression by (A) NK, (B)  $\gamma\delta$  T and (C) B cells associated with age (years). Scatterplot line performed by Loess regression, Spearman's rank correlation.



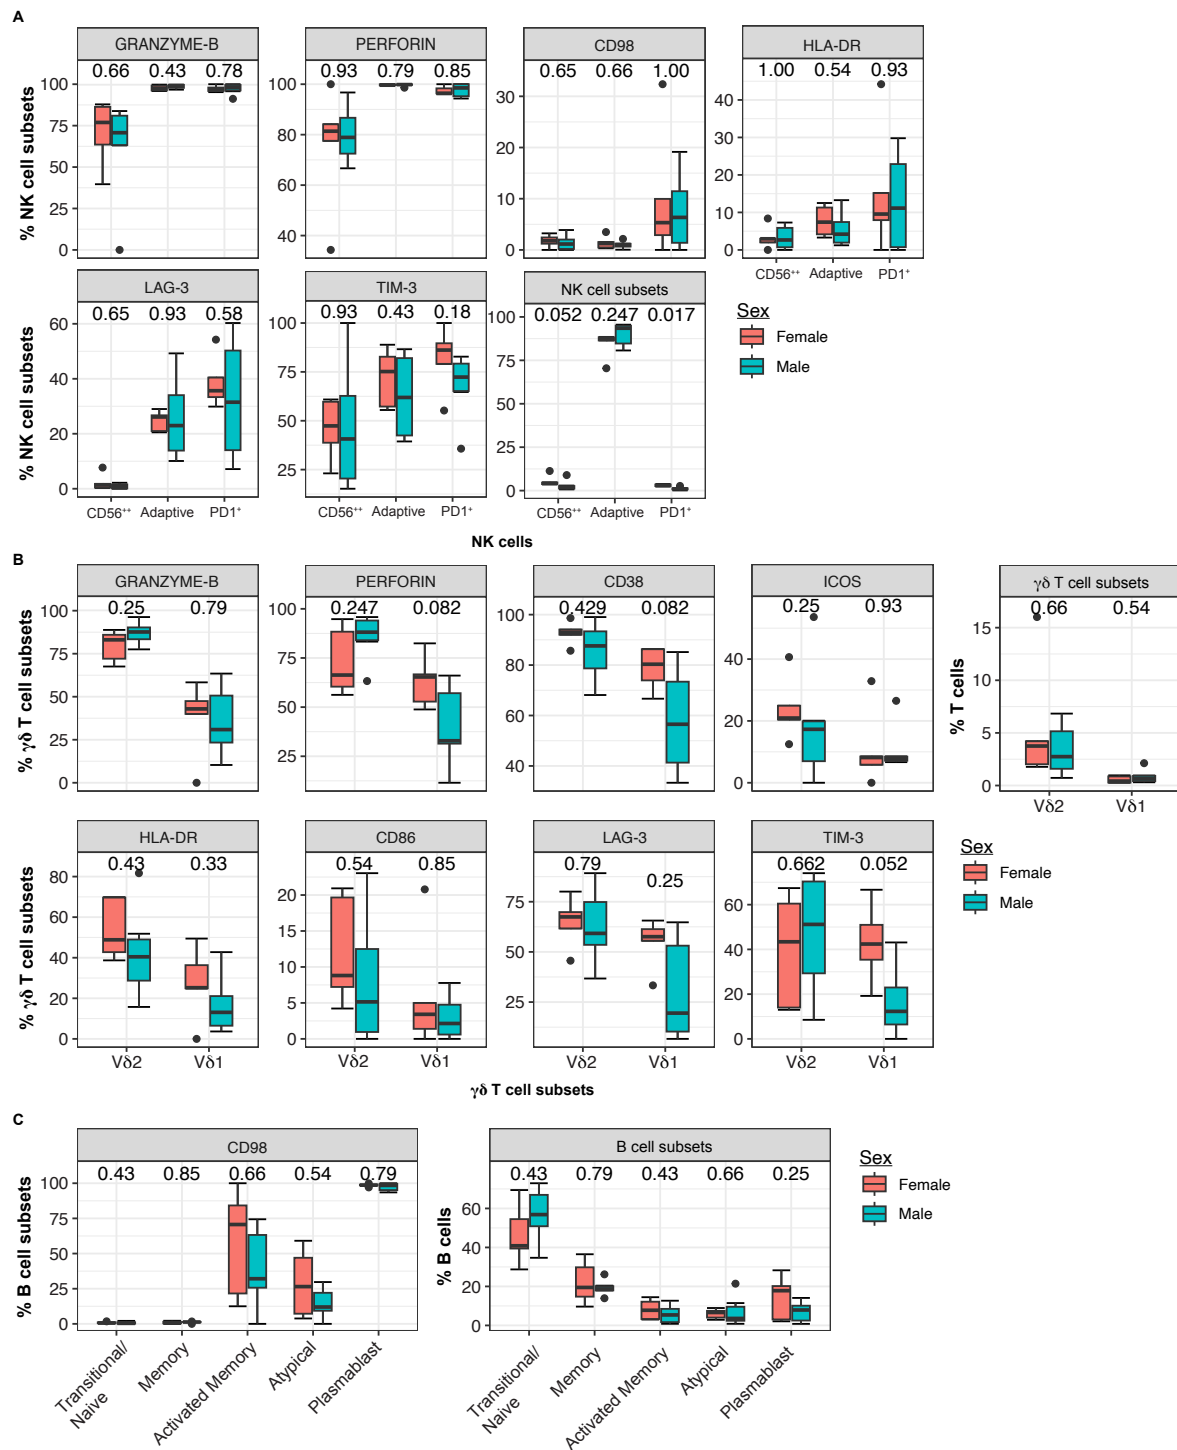

**Supplementary Fig. 10: Association of sex with lymphocyte *ex vivo* phenotypes and frequencies.**

Peripheral blood mononuclear cells from individuals with acute *Plasmodium falciparum* infection (day 0,  $n=11$ ) were analysed *ex vivo*. Cell frequencies and marker expression by (A) NK, (B)  $\gamma\delta$  T and (C) B cells associated with sex. Scatterplot line performed by Loess regression, Spearman's rank correlation

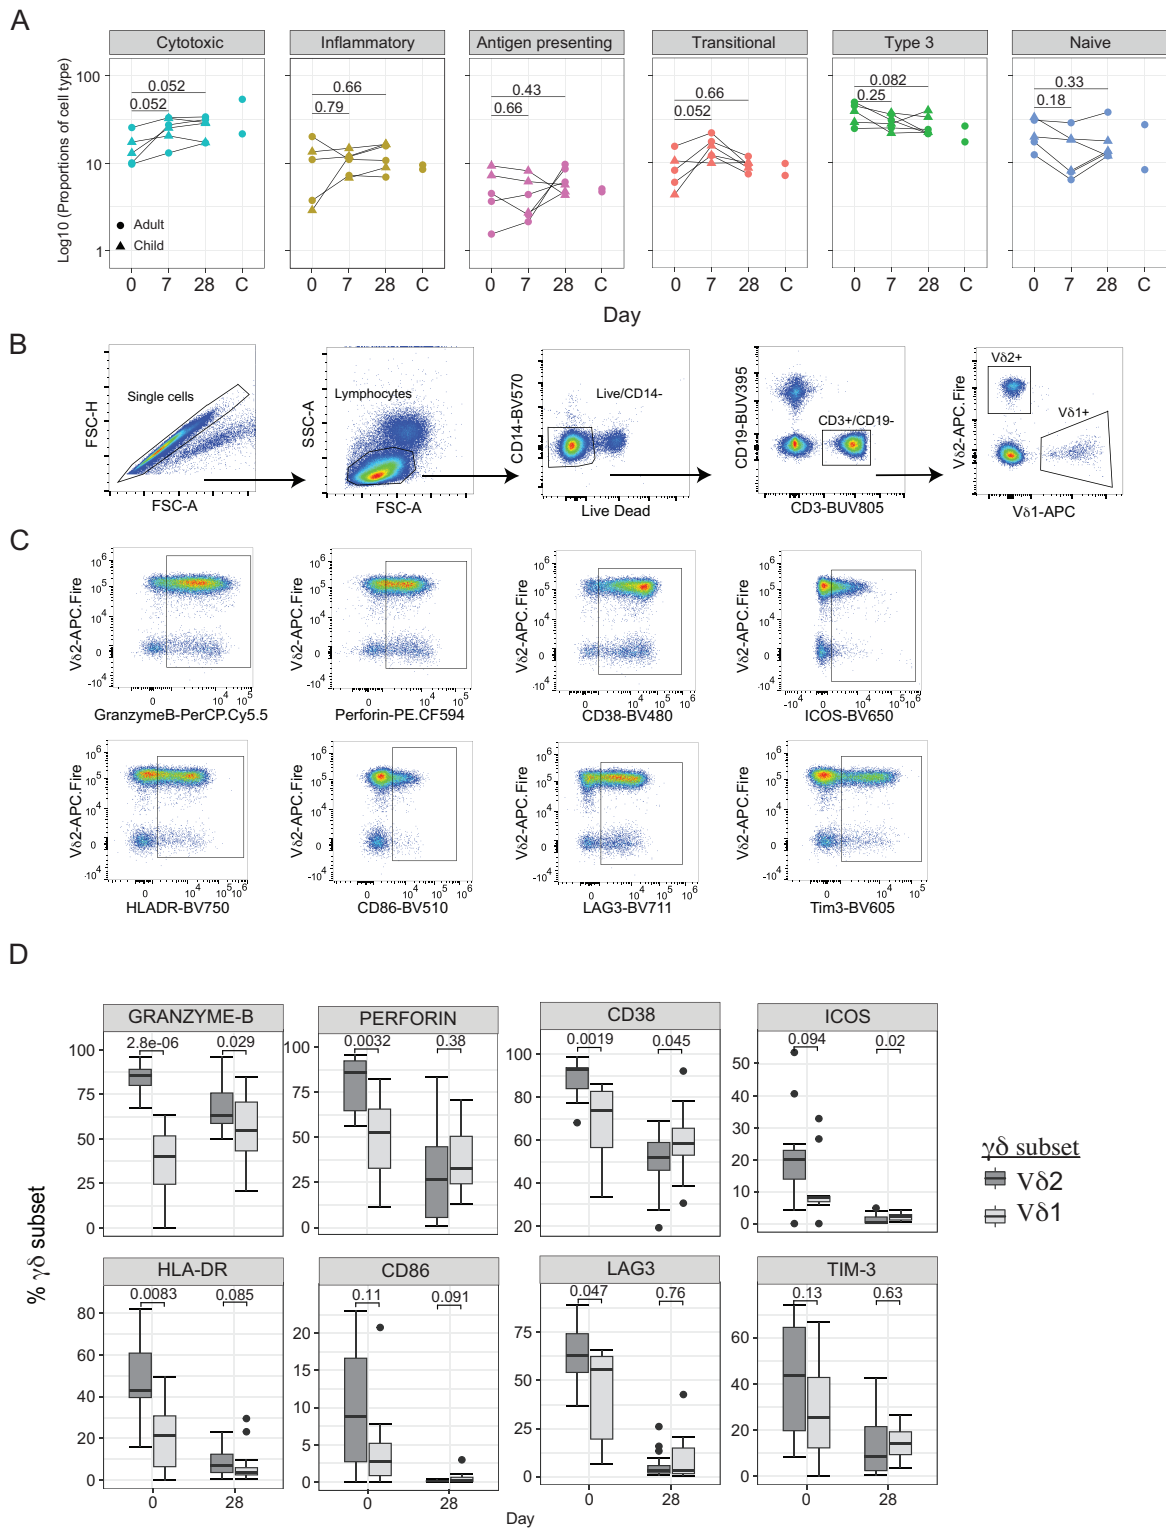

**Supplementary Fig. 11: Flow cytometric analysis of  $\gamma\delta$  T cells.** (A) Relative proportions of identified  $\gamma\delta$  T cell subsets within scRNAseq data during malaria infection (day 0), 7 days and 28 days post treatment, and in healthy uninfected individuals (C) ( $n=5$  day 0,  $n=6$  day 7,  $n=6$  day 28,  $n=2$  C). (B) FACS gating strategy to identify V $\delta$ 2 and V $\delta$ 1  $\gamma\delta$  T cells. (C) Representative FACS gating of Granzyme-B, Perforin, CD38, ICOS, HLA-DR, CD86, LAG-3, TIM-3 on V $\delta$ 2 and V $\delta$ 1  $\gamma\delta$  T cells. (D)

Surface marker frequency comparison between V $\delta$ 2 and V $\delta$ 1  $\gamma\delta$  T cells at day 0 ( $n=11$ ) and day 28 ( $n=17$ ) timepoints. For all data, box plots show the median and IQR of volunteers, lines represent paired observations, group comparisons performed by Mann Whitney U test.

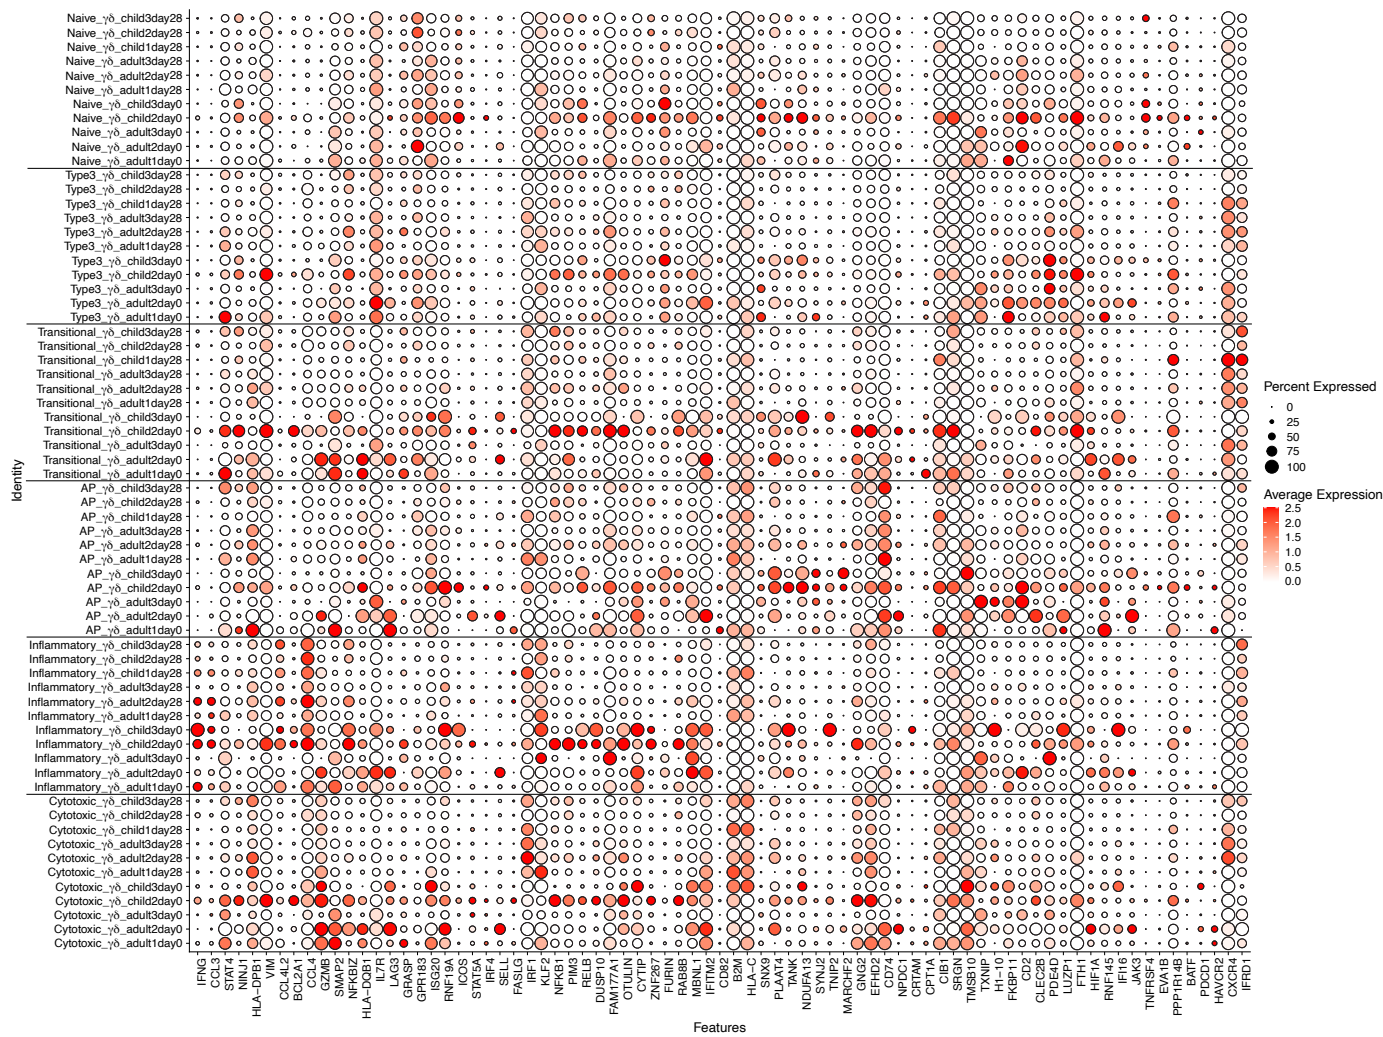

**Supplementary Fig. 12: Malaria driven differential expressed genes in  $\gamma\delta$  T cell subsets as average expression of each donor at day 0 and day 28.**

Average expression level (white to red) & percentage of expression (dot size) in cell population in the individual at day 0 and day 28 from each cell cluster.

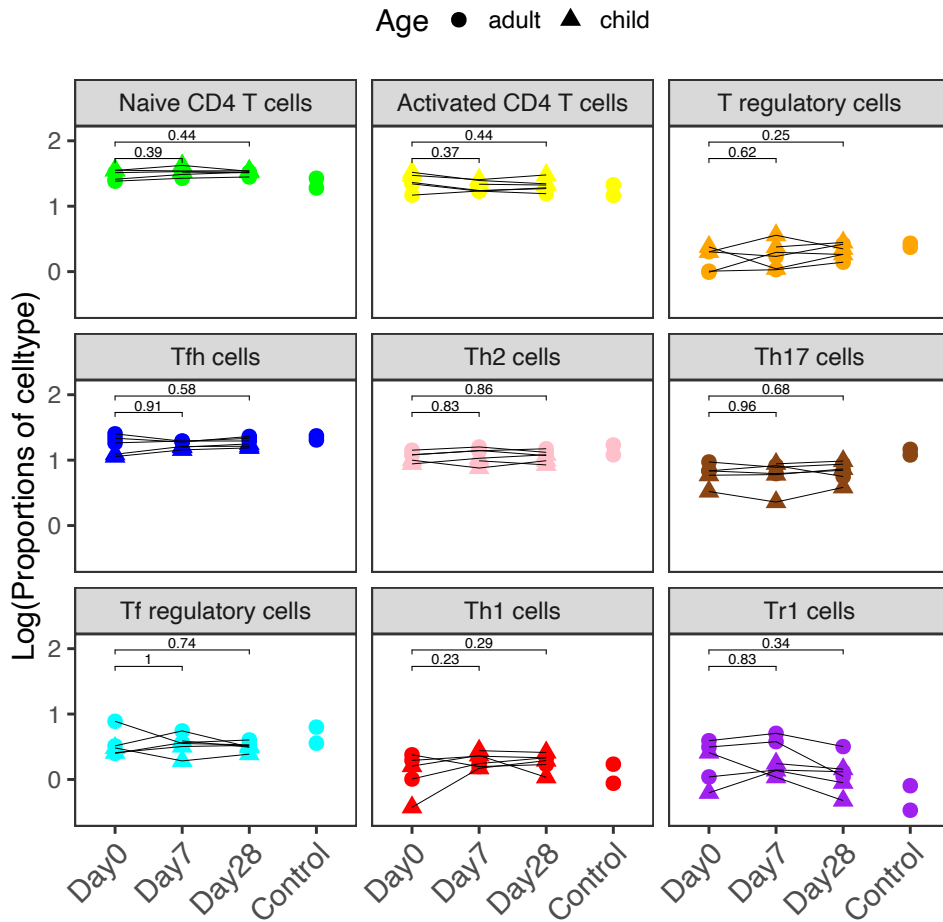

**Supplementary Fig. 13: Proportional distribution of CD4 T cell subsets in scRNAseq data.** The proportion of each CD4 T cell subset, as a percentage of total CD4 T cells was calculated for each individual and timepoint ( $n=5$  day 0,  $n=6$  day 7,  $n=6$  day 28 and  $n=2$  C (healthy uninfected control)). Log10 proportion is shown, group comparisons were performed by Mann Whitney U test.

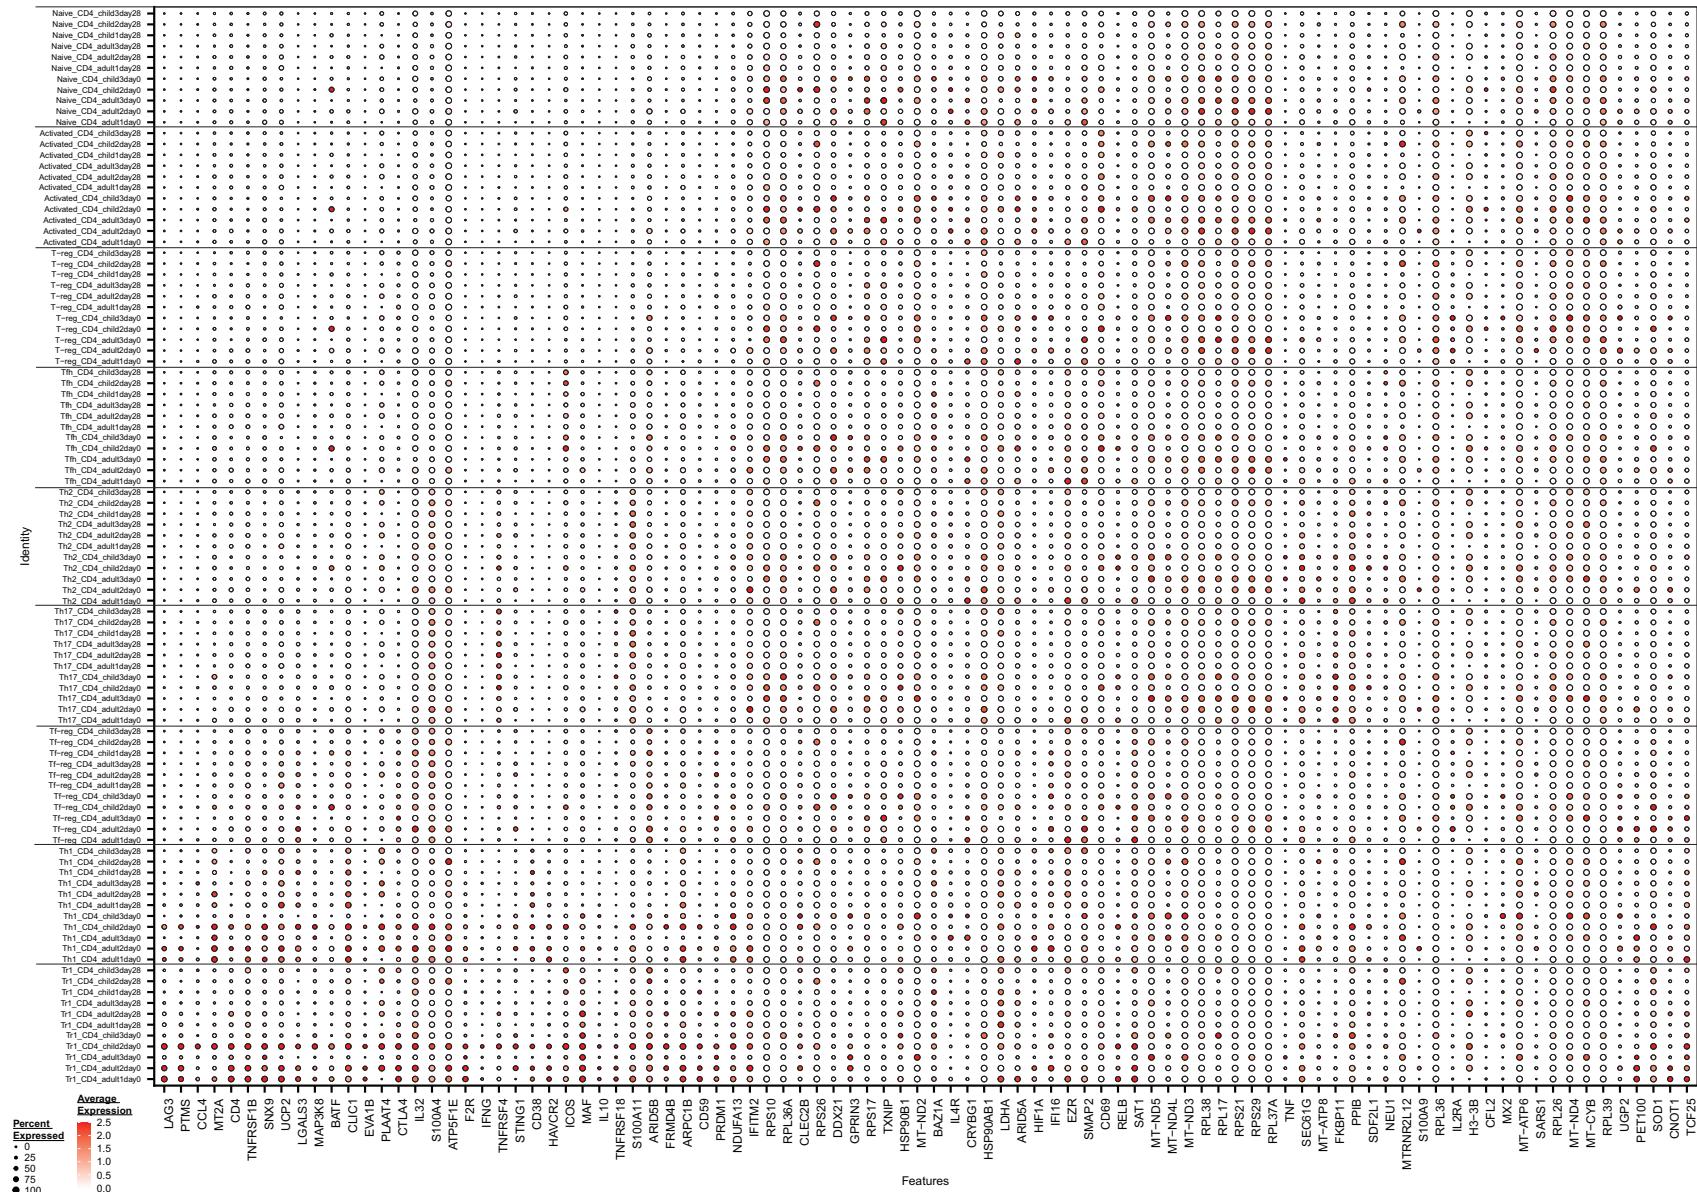

Supplementary Fig. 14: Malaria driven differential expressed genes in CD4 T cell subsets as average expression of each donor at day 0 and day 28.

Average expression level (white to red) and percentage of expression (dot size) in cell population of genes in the individual at day 0 and day 28 from each cell cluster.

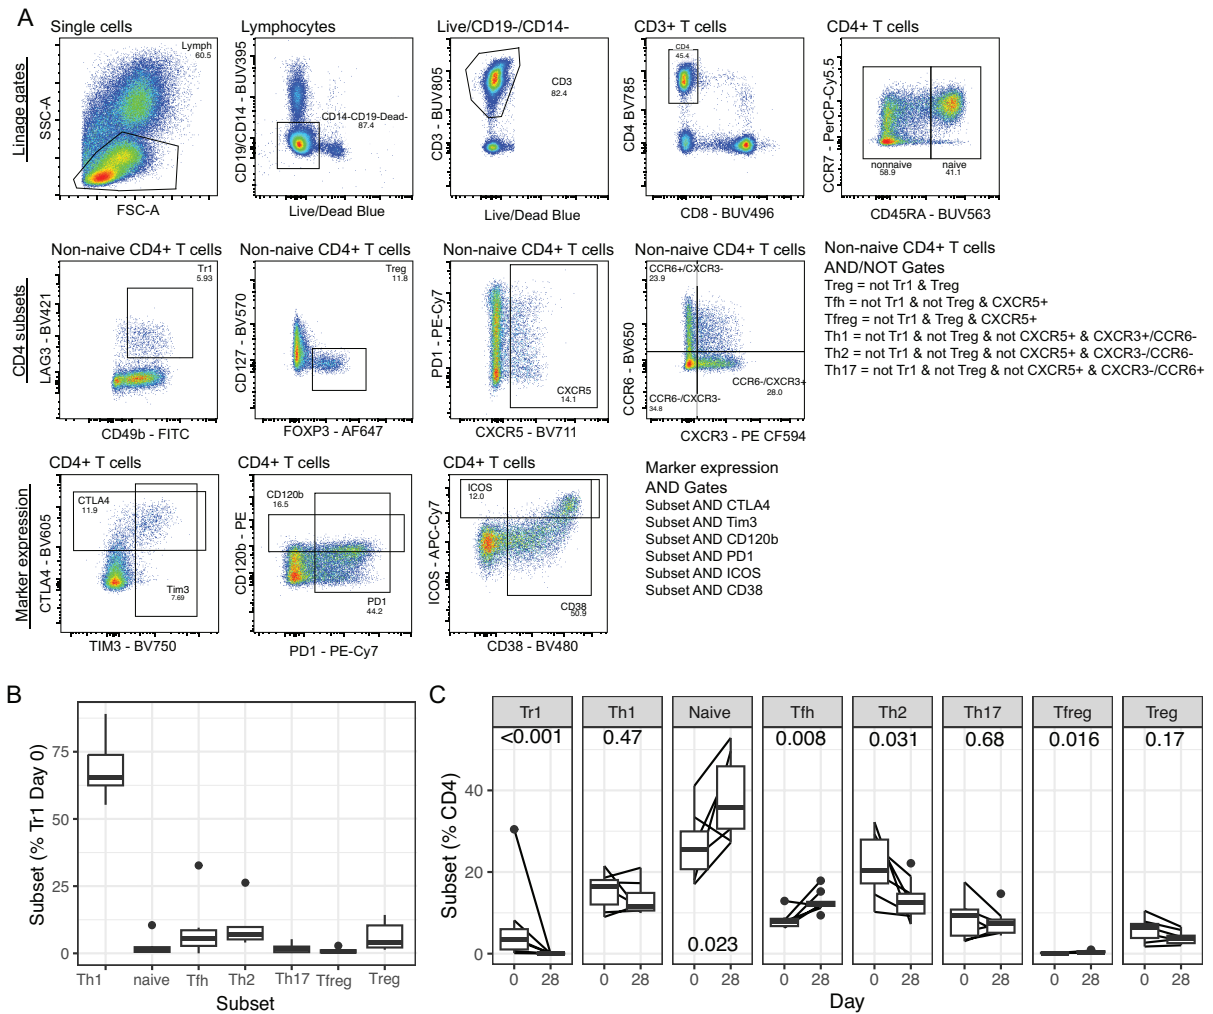

**Supplementary Fig. 15: Flow cytometric analysis of CD4 T cells.** PBMCs from individuals with acute *Plasmodium falciparum* infection (day 0,  $n=7$ ) and 28-days post-infection (day 28  $n=9$ ), were analysed *ex vivo* to identify NK cell protein expression of DEGs. **(A)** Flow cytometry gating strategy to identify CD4 T cell subsets: Tr1, Th1, Naive, Tfh, Th2, Th17, Treg and Treg. **(B)** CD4 T cell subsets proportions of Tr1 cells. **(C)** CD4 T cell subsets proportion of total CD4 at day 0 and day 28. Boxplots show the median and IQR of volunteers, lines represent paired observations, group comparisons performed by Mann Whitney U test.



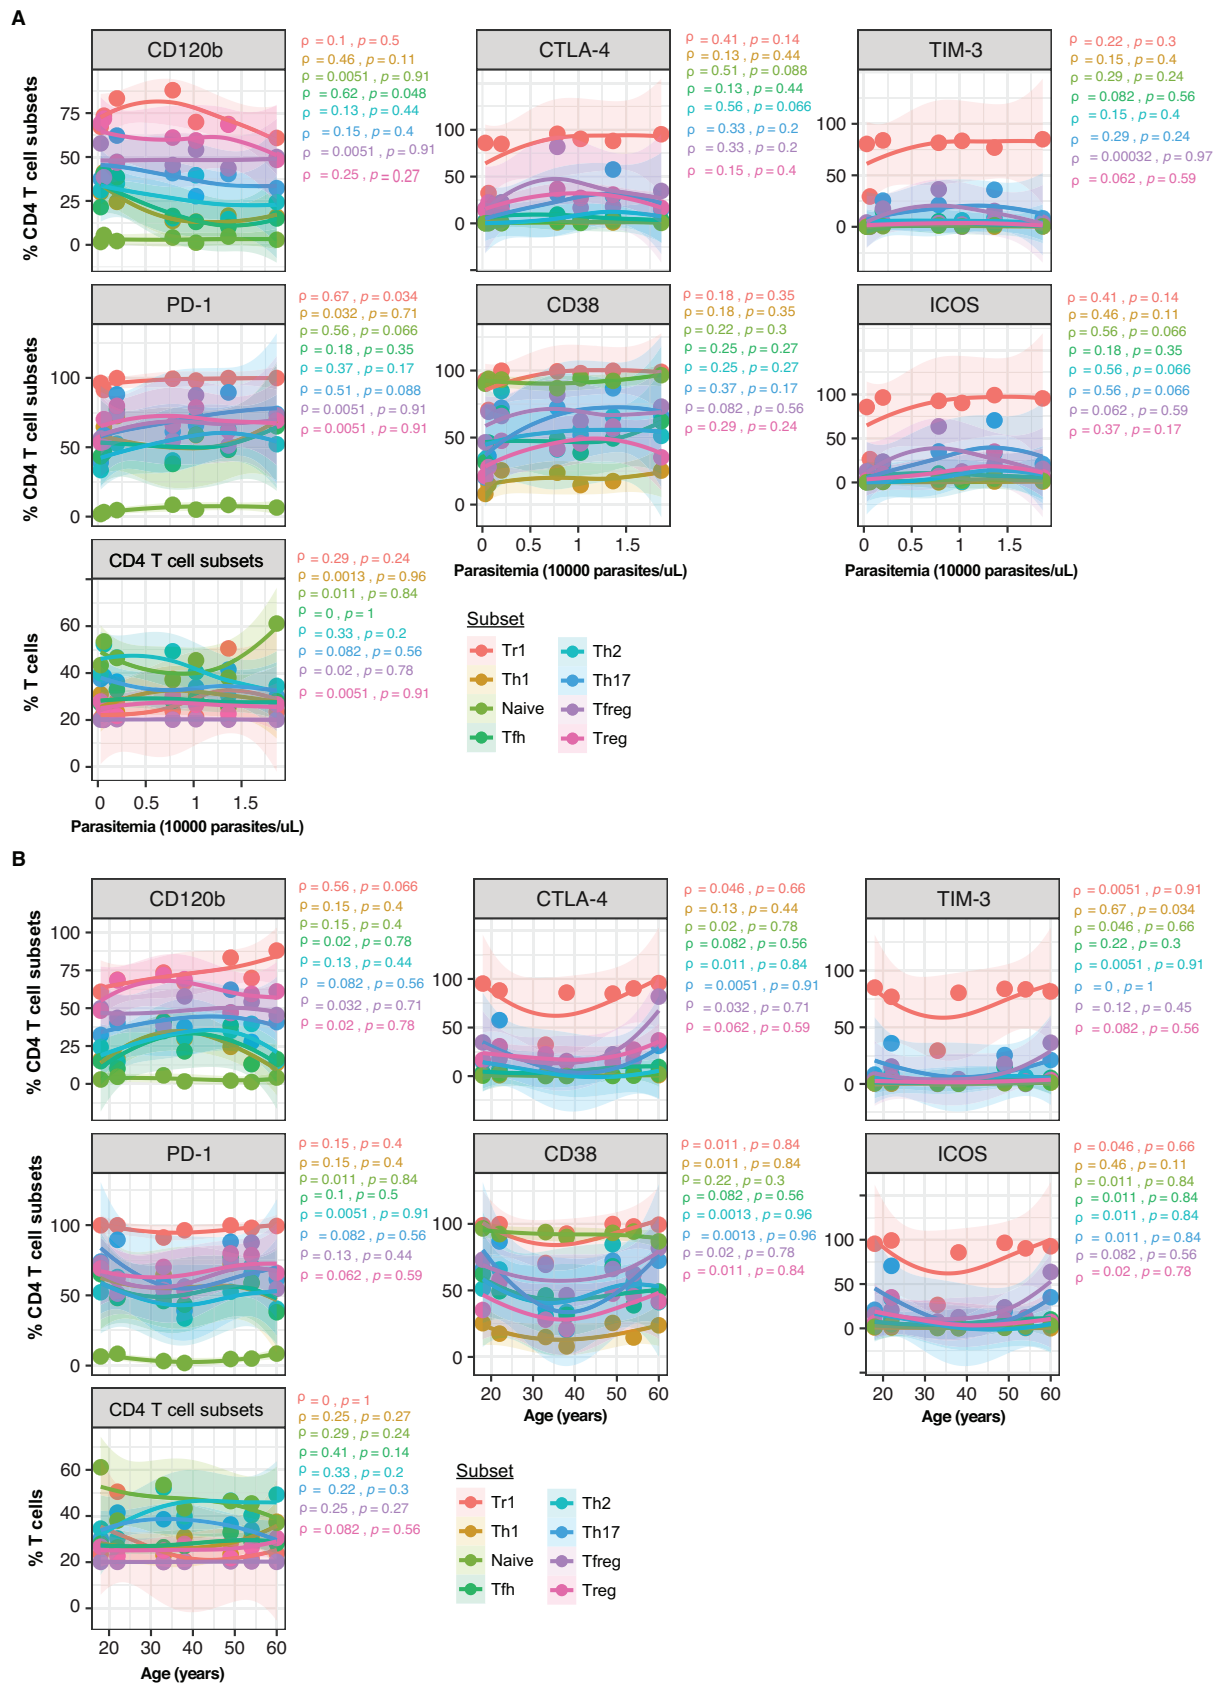

**Supplementary Fig. 16: Association of blood parasitemia and age with CD4 T cell *ex vivo* phenotypes and frequencies.** PBMCs from individuals with acute *Plasmodium falciparum* infection (day 0,  $n=11$ ) were analysed *ex vivo*. CD4 T cell frequencies and marker expression associated with (A)

*Plasmodium falciparum* parasitemia (10000 parasites/ $\mu$ L) and **(B)** age (years). Scatterplot line performed by Loess regression, Spearman's rank correlation.

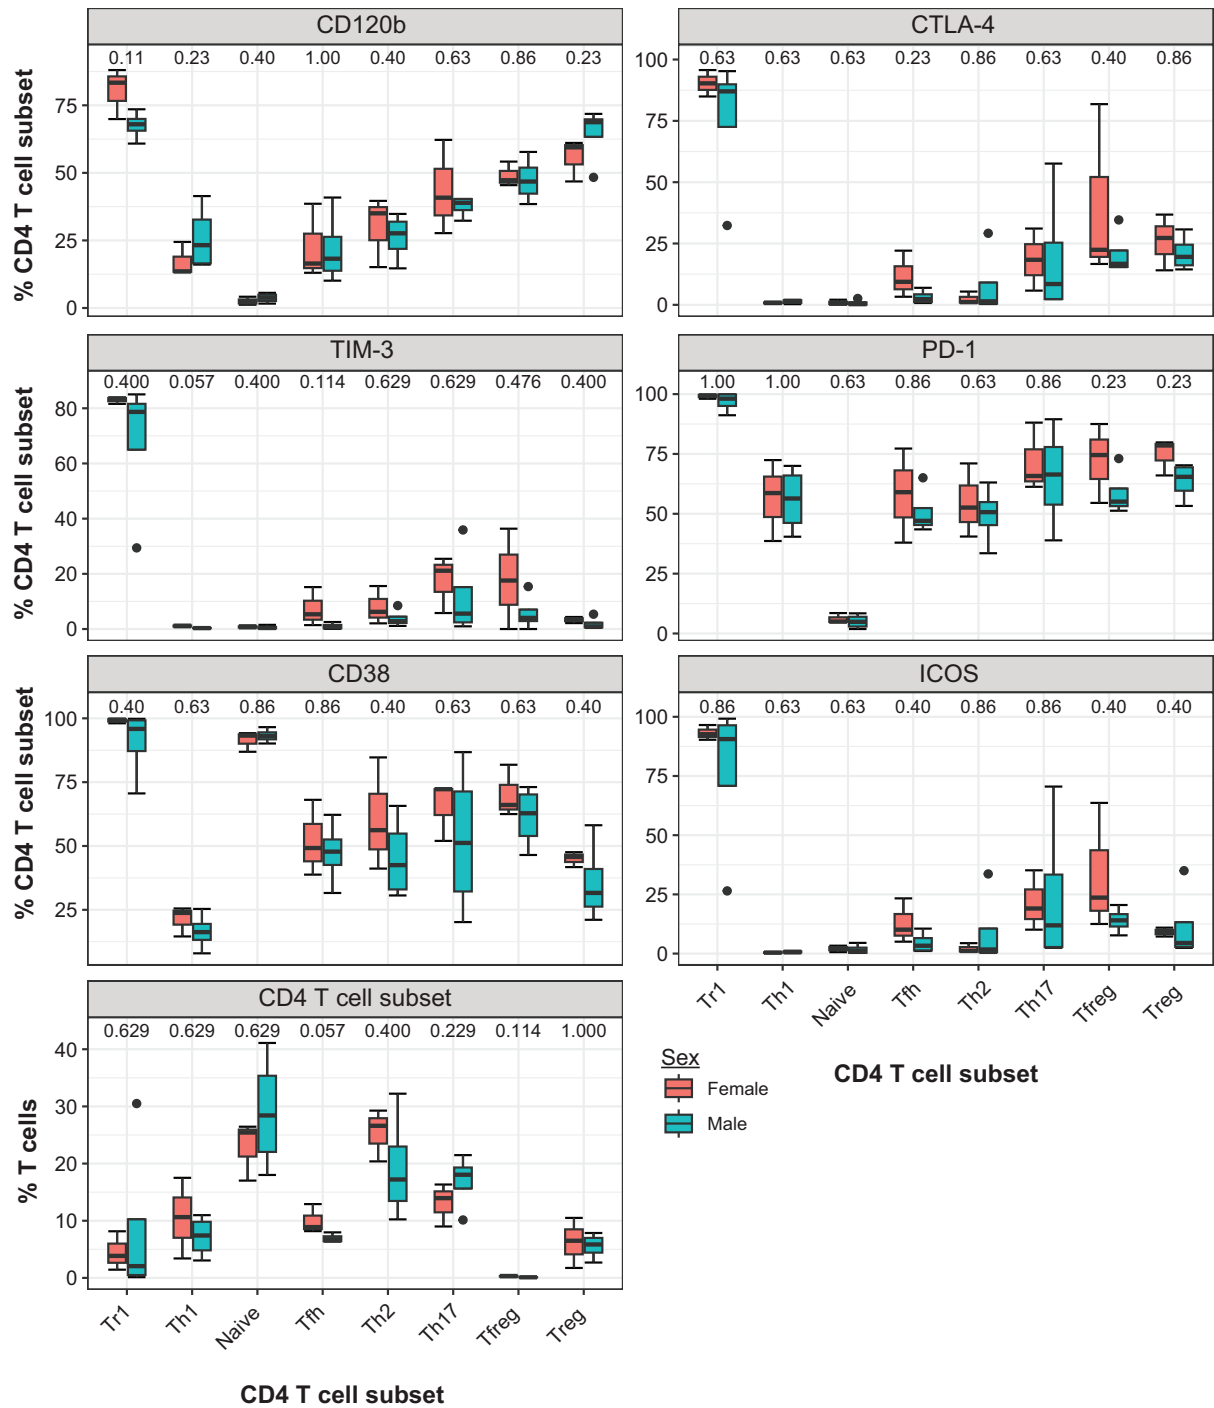

**Supplementary Fig. 17: Association of sex with CD4 T cell *ex vivo* phenotypes and frequencies.**

PBMCs from individuals with acute *Plasmodium falciparum* infection (day 0,  $n=11$ ) were analysed *ex vivo*. CD4 T cell frequencies and marker expression associated with sex Scatterplot line performed by Loess regression, Spearman's rank correlation. Boxplots show the median and IQR of volunteers, comparisons performed by Mann Whitney U test.

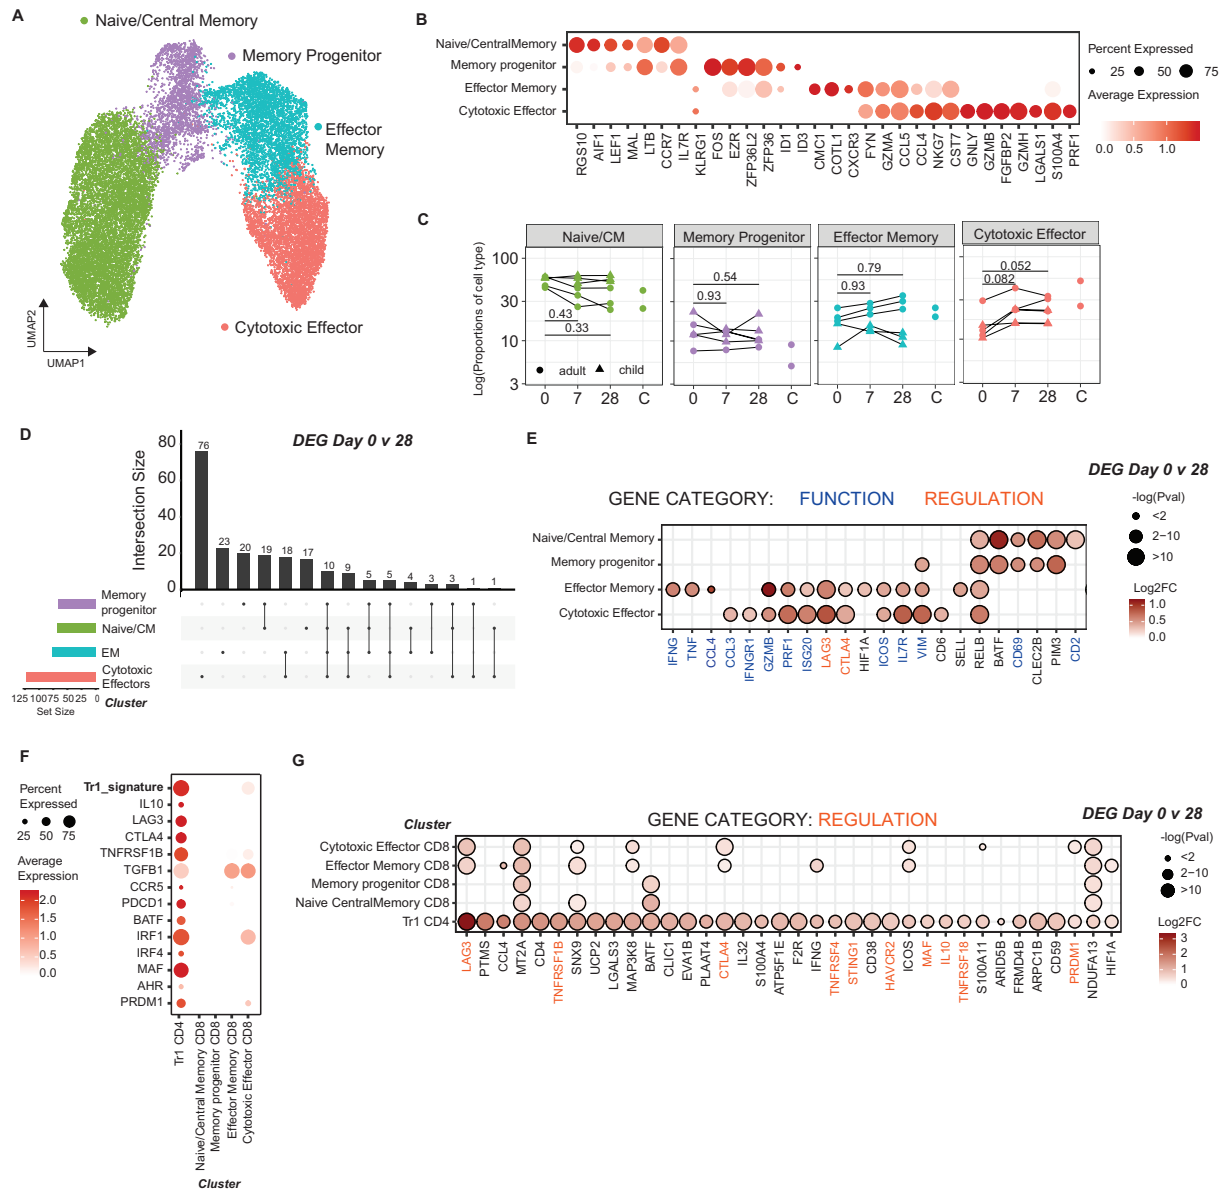

**Supplementary Fig. 18: Activation and regulation of CD8 T cells during malaria.** (A/B) Four subsets of CD8 T cells were identified based on unsupervised clustering and marker expression as Naive/Central Memory, Memory Progenitor, Effector Memory and Cytotoxic Effector. (C) Relative proportions of identified CD8 T cell subsets within scRNAseq data during malaria infection (day 0), 7 days and 28 days post treatment, and in healthy uninfected individuals (C) ( $n=5$  day 0,  $n=6$  day 7,  $n=6$  day 28,  $n=2$  C). P-value indicated is calculated by Mann-Whitney U test between day 0 and indicated time points. (D) Numbers of upregulated DEGs in CD8 T cell subsets day 0 compared to day 28. The number of shared and subset specific DEGs indicated. (E) Top 10 upregulated DEGs in each CD8 T cells subsets with  $p \leq 0.05$  and known function. Genes with inflammatory/cytotoxic function and

roles in regulation are indicated. Log transformed p values generated with the Benjamini-Hochberg procedure to control false discovery rate (FDR). (F) Average expression of canonical Tr1 genes and Tr1\_signature in Tr1 CD4 T cells and CD8 T cell subsets. (G) Top 20 DEGs upregulated during acute malaria in Tr1 CD4 directly compared with differential expression in non-Tr1 CD4 T cells and CD8 T cell clusters.

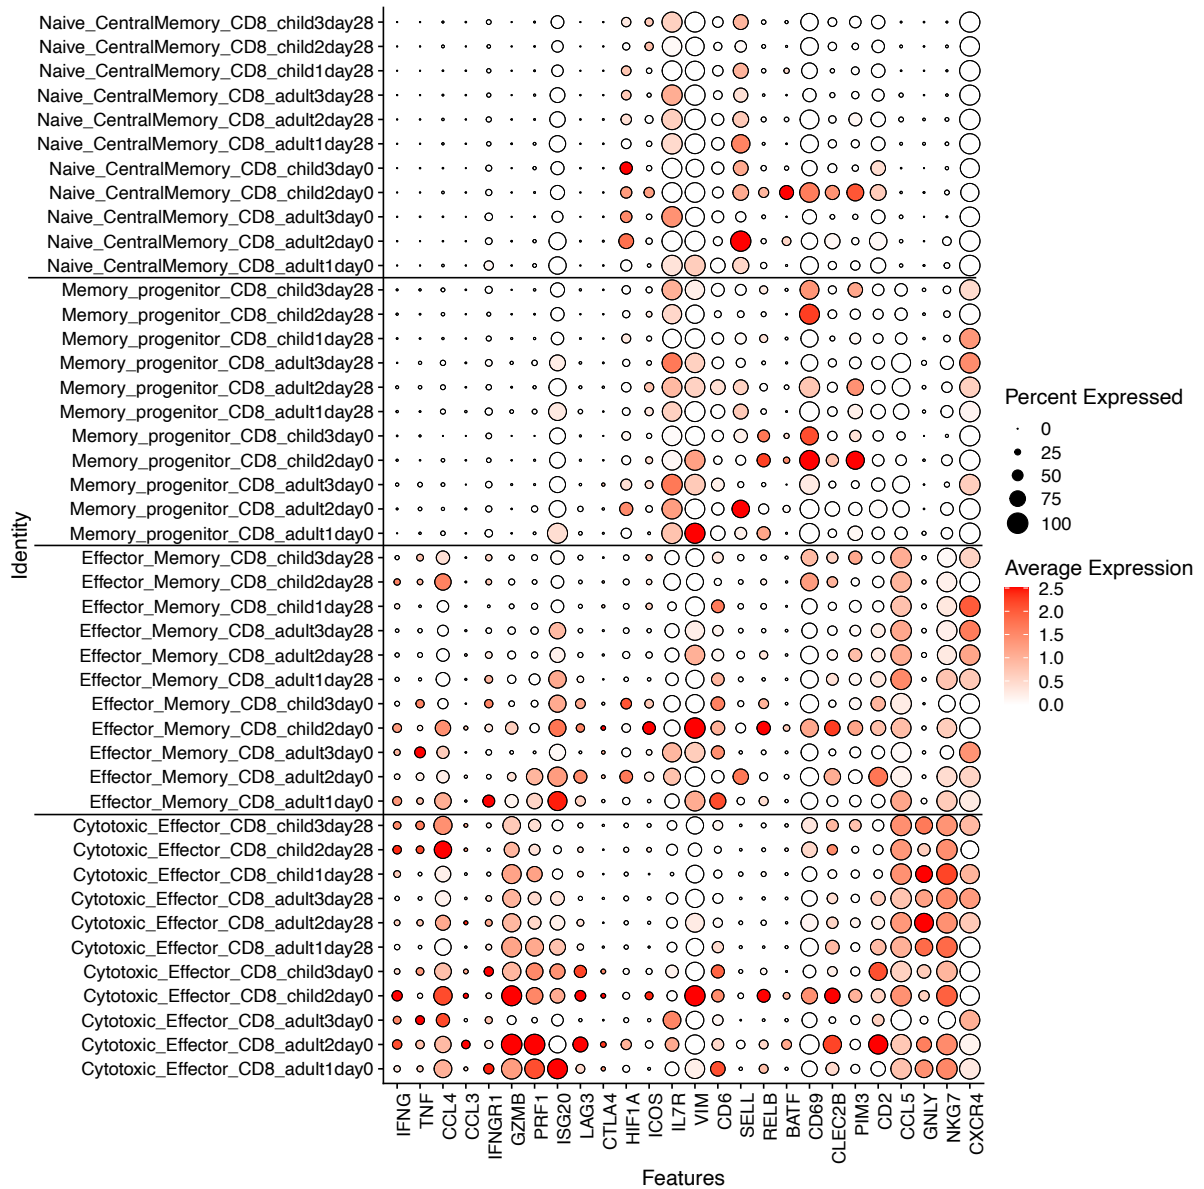

**Supplementary Fig. 19: Malaria driven differential expressed genes in CD8 T cell subsets as average expression of each donor at day 0 and day 28. Average expression level (white to red) and percentage of expression (dot size) in cell population of genes in the individual at day 0 and day 28 from each cell cluster.**

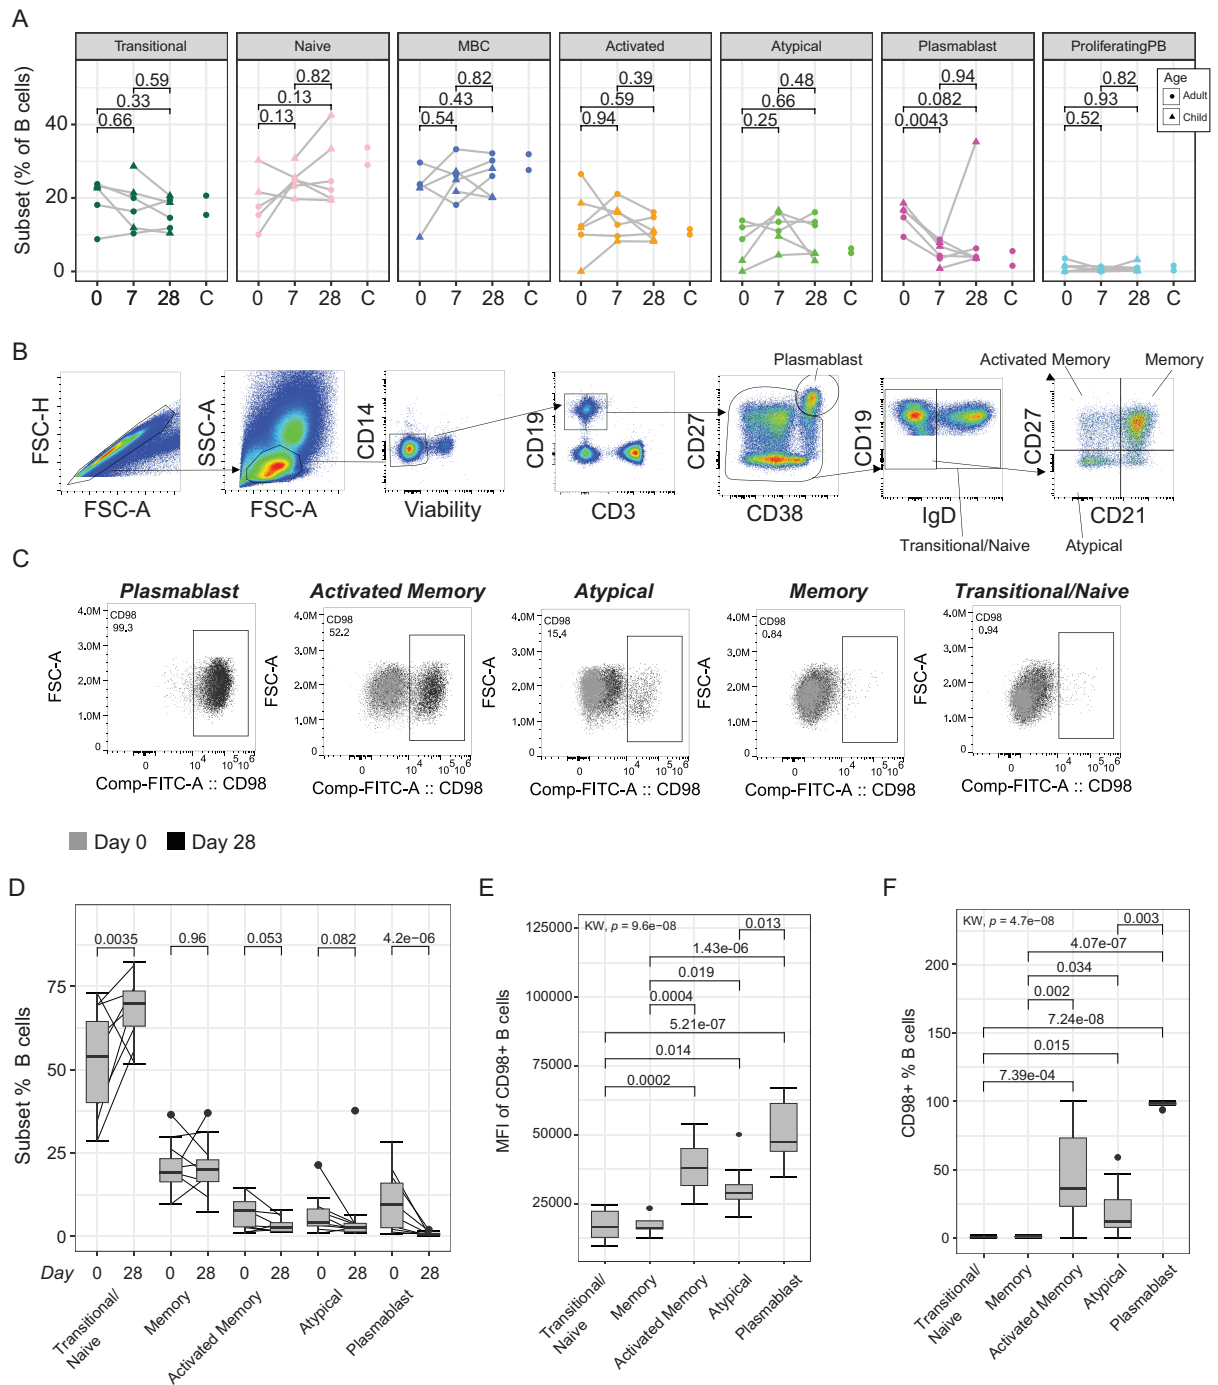

**Supplementary Fig. 20: Proportional distribution of B cell subsets and CD98 protein expression.**

(A) Relative log<sub>10</sub> proportions of identified of CD8 T cell subsets within scRNAseq data during malaria infection (day 0), 7 days and 28 days post treatment, and in healthy uninfected individuals (C) ( $n=5$  day 0,  $n=6$  day 7,  $n=6$  day 28,  $n=2$  C). (B) B cell subset gating strategy. (C) Representative FACS gating of CD98 expression on each B cell subset at day 0 versus day 28. (D) B cell subset proportion of total B cells at day 0 ( $n=11$ ) and day 28 ( $n=17$ ). P-values calculated by Mann Whitney U test. (E) MFI of

CD98<sup>+</sup> B cell subsets ( $n=5$  day 0,  $n=8$  day 28) and (F) CD98<sup>+</sup> proportion of B cell subsets at day 0 ( $n=11$  day 0). Kruskal-Wallis and post-hoc Dunn test (FDR adjusted) indicated.



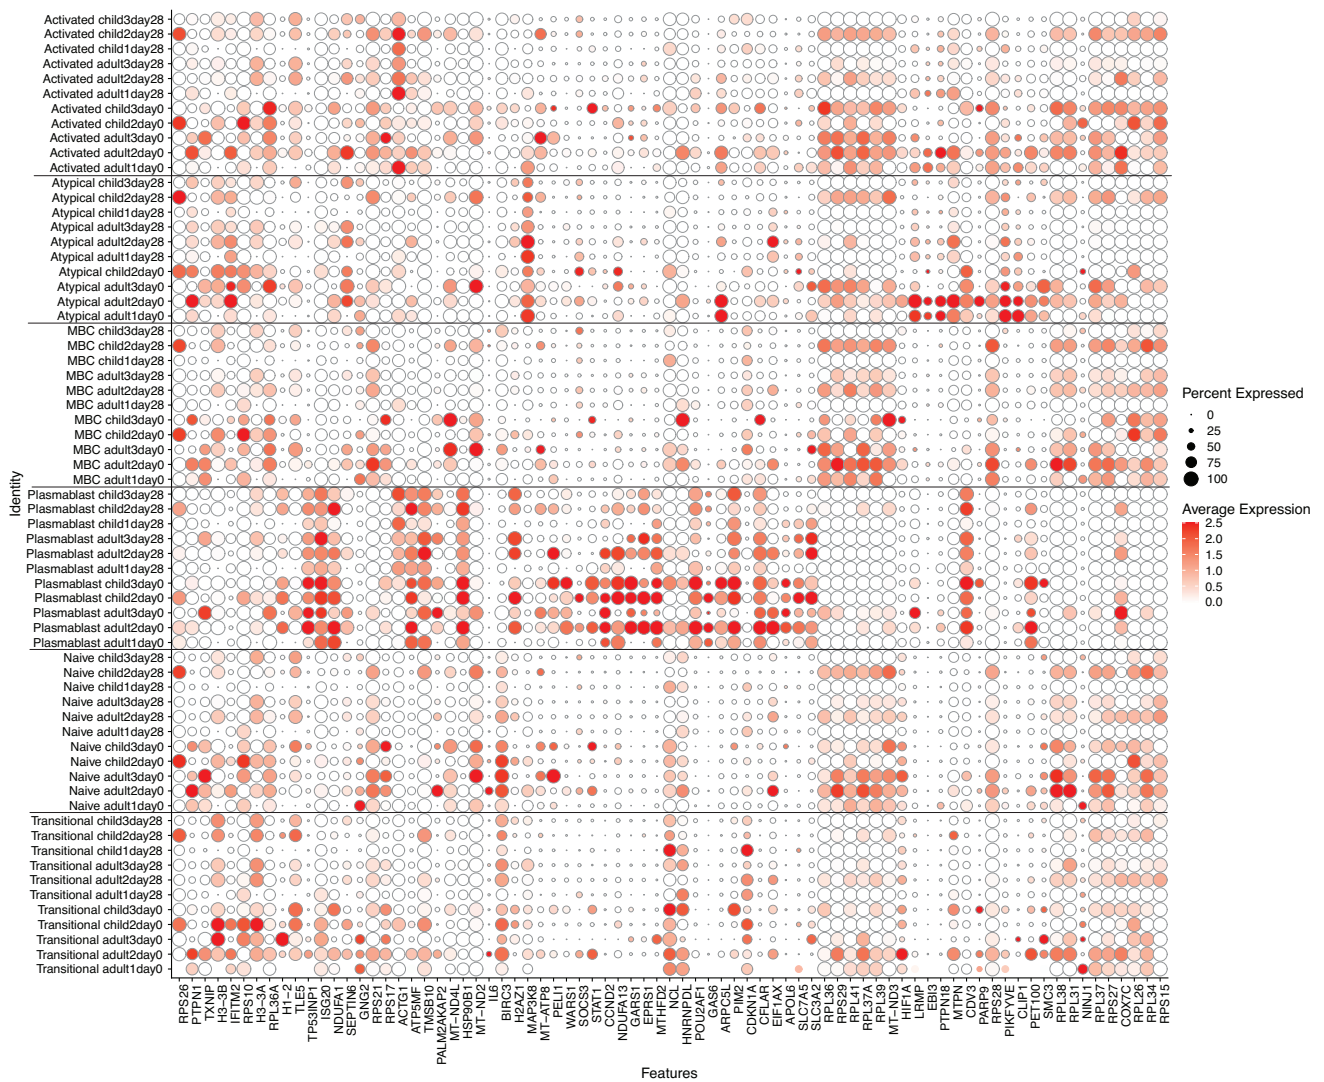

**Supplementary Fig. 21: Malaria driven differential expressed genes in B cell subsets as average expression of each donor at day 0 and day 28. Average expression level (white to red) and percentage of expression (dot size) in cell population of genes in the individual at day 0 and day 28 from each cell cluster.**

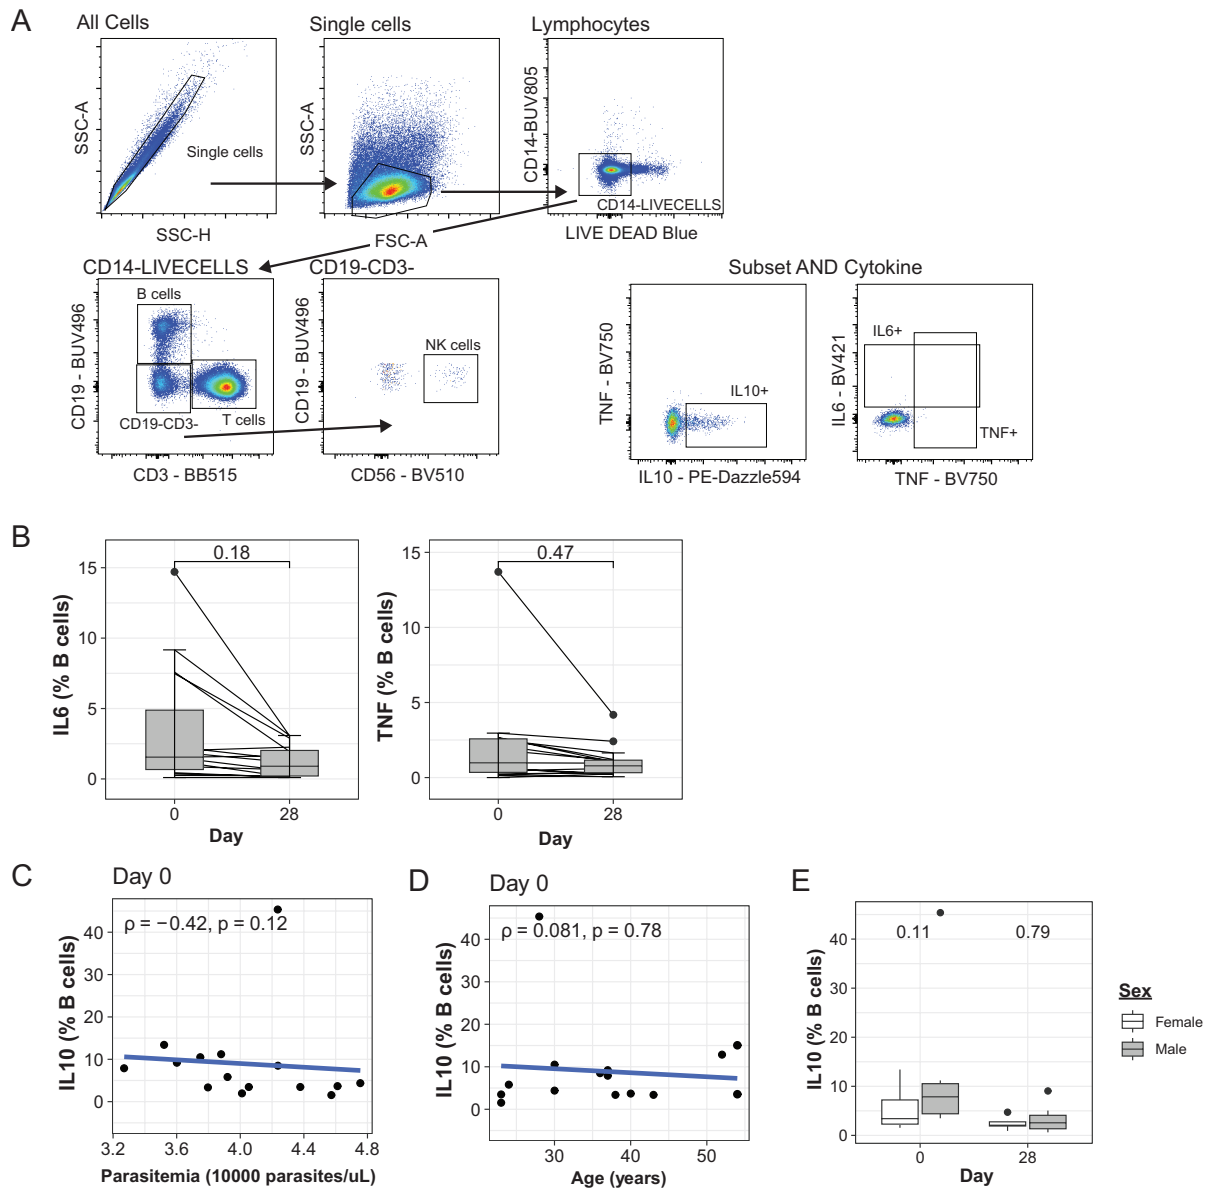

**Supplementary Fig. 22: B cell *ex vivo* intracellular cytokine capture.** To investigate key changes to B cell cytokine production, PBMCs from patients with malaria (day 0) and 28 days post treatment were rested *ex vivo* for 4 hours and cytokine captured by addition of Monensin then measured by flow cytometry. **(A)** B cell gating strategy and representative FACS gating of IL10, IL6 and TNF intracellular cytokine expression. **(B)** IL6 and TNF expression in B cells at day 0 ( $n=15$ ) and day 28 ( $n=14$ ). Frequency of IL10 positive B cells linear association with **(C)** *Plasmodium falciparum* parasitemia (10000 parasites/ $\mu$ L), **(D)** age (years) and **(E)** sex. Scatterplot line performed by linear regression, Spearman's rank correlation. Box plots show the median and IQR of volunteers, group comparisons performed by Mann Whitney U test.

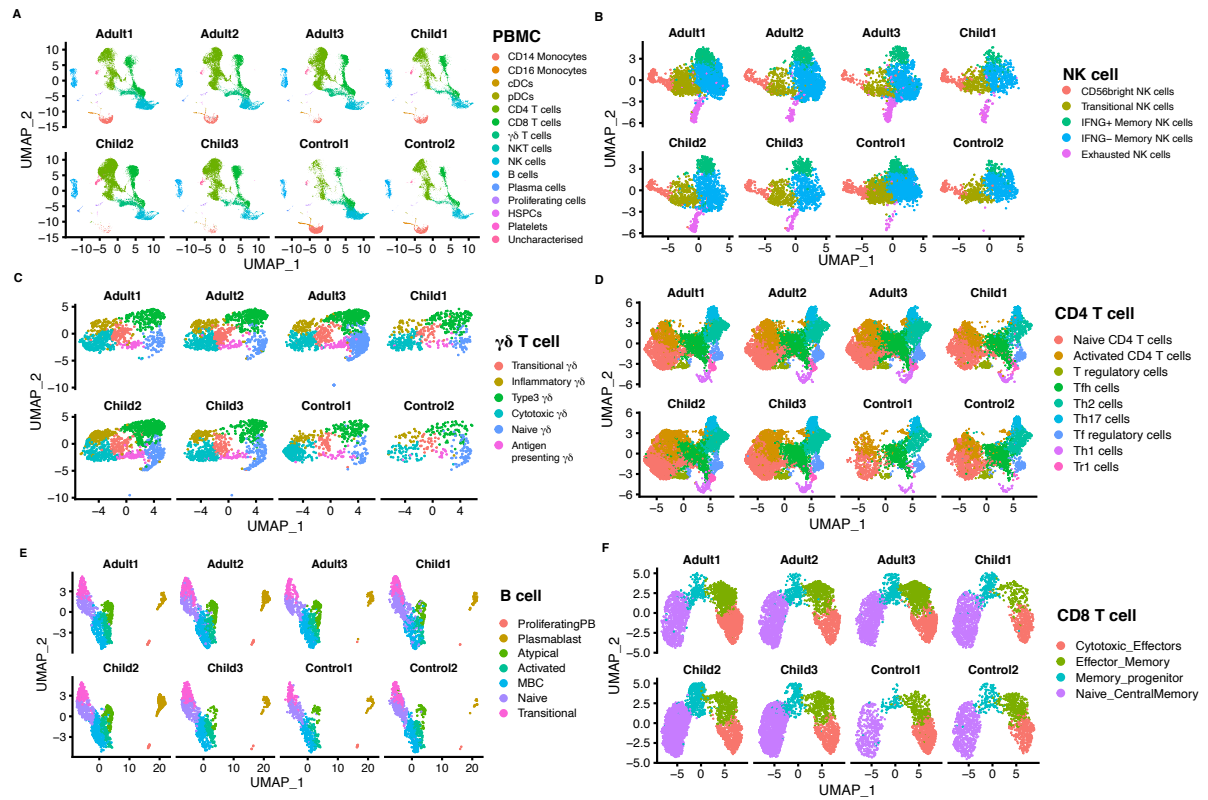

**Supplementary Fig. 23: UMAP of PBMC and cell subset clusters by individual donor**

UMAP of total PBMC analysis (A) and subclustered cells [NK cells (B),  $\gamma\delta$  T cells (C), CD4 T cells (D), B cells (E), and CD8 T cells (F)], split by each individual donor.

**Supplementary Table 1: Patient characteristics.**

| 10XID | ID       | Study Assay            | Day    | Age | Sex    | Enrolment Date | Previous Malaria | Previous Malaria in last 2 months | Treatments Received | Parasite/uL (Enrol) | Fever | Body Temperature | Days with Fever | White blood cells (WBC) 10 <sup>3</sup> /uL | Haematocrit (HCT) % | Anaemia | Liver palpable | Spleen palpable | Mosquito Net Use | CMV Status |
|-------|----------|------------------------|--------|-----|--------|----------------|------------------|-----------------------------------|---------------------|---------------------|-------|------------------|-----------------|---------------------------------------------|---------------------|---------|----------------|-----------------|------------------|------------|
| I/Q/J | adult2   | scRNAseq               | 0/7/28 | 22  | Female | 17/06/15       | No               | NA                                | ASMQ                | 2522                | Yes   | 38.5             | 4               | 8.7                                         | 44.4                | No      | No             | No              | NA               | Positive   |
| A/B/C | adult1   | scRNAseq               | 0/7/28 | 21  | Male   | 18/06/15       | No               | NA                                | ASMQ                | 30463               | Yes   | 37.3             | 7               | 8.2                                         | 42.3                | No      | No             | No              | NA               | Positive   |
| O/T/P | child3   | scRNAseq               | 0/7/28 | 13  | Male   | 18/06/15       | No               | NA                                | ASMQ                | 1459                | Yes   | 37.3             | 2               | 6.7                                         | 37.7                | No      | No             | No              | NA               | Positive   |
| M/S/N | child2   | scRNAseq               | 0/7/28 | 8   | Male   | 6/07/15        | No               | NA                                | ASMQ                | 40662               | Yes   | 37.5             | 5               | 6.7                                         | 34                  | No      | No             | No              | NA               | Positive   |
|       |          | monoB-P                | 0      | 23  | Female | 2/05/15        | No               | NA                                | ART & AL            | 37404               | Yes   | 39.7             | 2               | 7.2                                         | 39.4                | No      | No             | No              | NA               | Positive   |
| E/F/G | child1   | scRNAseq               | 0/7/28 | 6   | Male   | 18/06/15       | No               | NA                                | ART & AL & PQ       | 146388              | Yes   | 40.3             | 3               | 3.3                                         | 25.1                | No      | No             | No              | NA               | Positive   |
| K/R/L | adult3   | scRNAseq,gdbnk-P,CD4-P | 0/7/28 | 24  | Male   | 18/06/15       | No               | NA                                | AL & PQ             | 34                  | Yes   | 36.8             | 3               | 6.8                                         | 42.6                | No      | No             | No              | NA               | Positive   |
| D     | control1 | scRNAseq               | NA     | 27  | Male   | 6/07/11        | NA               | NA                                | NA                  | NA                  | No    | 36               | NA              | NA                                          | NA                  | NA      | NA             | NA              | always           | Positive   |
| H     | control2 | scRNAseq               | NA     | 20  | Male   | 13/07/11       | NA               | NA                                | NA                  | NA                  | No    | 36.8             | NA              | NA                                          | NA                  | NA      | NA             | NA              | never            | Positive   |
|       | adult4   | gdbnk-P                | 0      | 45  | Male   | 26/04/11       | No               | NA                                | AL                  | 81062               | Yes   | 40               | 14              | 8.4                                         | 46.1                | No      | No             | No              | always           | Positive   |
|       | adult5   | gdbnk-P                | 0      | 37  | Female | 27/04/11       | No               | NA                                | ART & AL            | 32267               | Yes   | 40               | 7               | 6                                           | 36.7                | No      | No             | Hackett score 1 | never            | Positive   |
|       | adult6   | gdbnk-P                | 0      | 39  | Male   | 29/04/11       | No               | NA                                | AL                  | 1508                | Yes   | 37.5             | 2               | 5.2                                         | 40.3                | No      | No             | No              | never            | Positive   |
|       | adult7   | gdbnk-P                | 28     | 49  | Male   | 9/05/11        | No               | NA                                | CQ & PQ & AL        | NA                  | NA    | NA               | NA              | NA                                          | NA                  | NA      | NA             | NA              | never            | Positive   |
|       | adult8   | gdbnk-P                | 28     | 54  | Male   | 9/05/11        | No               | NA                                | CQ & ART & AL & PQ  | NA                  | NA    | NA               | NA              | NA                                          | NA                  | NA      | NA             | NA              | never            | Positive   |
|       | adult9   | gdbnk-P                | 0/28   | 54  | Female | 6/06/11        | Yes              | No                                | ART                 | 27905               | Yes   | 38.4             | 7               | 8.1                                         | 42.7                | No      | No             | No              | sometimes        | Positive   |
|       | adult10  | gdbnk-P_monoBnk-P      | 0/28   | 36  | Female | 9/06/11        | No               | NA                                | ASMQ                | 17263               | Yes   | 37.2             | 4               | 6.1                                         | 38.3                | No      | No             | No              | always           | Positive   |
|       | adult11  | monoBnk-P              | 0/28   | 54  | Female | 30/06/11       | No               | NA                                | ASMQ                | 10251               | Yes   | 38.2             | 3               | 5.1                                         | 34.8                | No      | No             | No              | always           | Positive   |
|       | adult12  | gdbnk-P                | 28     | 39  | Male   | 8/07/11        | No               | NA                                | AL & PQ             | NA                  | NA    | NA               | NA              | NA                                          | NA                  | NA      | NA             | NA              | sometimes        | Positive   |
|       | adult13  | gdbnk-P                | 28     | 46  | Female | 11/07/11       | Yes              | No                                | ART & AL            | NA                  | NA    | NA               | NA              | NA                                          | NA                  | NA      | NA             | NA              | always           | Positive   |
|       | adult14  | monoBnk-P              | 0/28   | 40  | Male   | 11/07/11       | Yes              | No                                | AL                  | 40895               | Yes   | 38.7             | 8               | 8.7                                         | 40.7                | No      | No             | No              | never            | Positive   |
|       | adult15  | monoBnk-P              | 0      | 37  | Male   | 3/09/11        | Yes              | No                                | AL                  | 3990                | Yes   | 36               | 4               | 7.6                                         | 38.3                | No      | No             | No              | never            | Positive   |
|       | adult16  | monoBnk-P              | 0/28   | 30  | Male   | 21/09/11       | No               | NA                                | AL                  | 56922               | Yes   | 39.6             | 14              | 7.8                                         | 41.2                | No      | No             | No              | always           | Positive   |
|       | adult17  | monoBnk-P              | 0/28   | 39  | Male   | 16/10/11       | No               | NA                                | AL                  | NA                  | NA    | NA               | NA              | NA                                          | NA                  | NA      | NA             | NA              | always           | Positive   |
|       | adult18  | monoBnk-P              | 0/28   | 37  | Male   | 19/11/11       | No               | NA                                | ART & AL            | 1862                | Yes   | 38.4             | 4               | 5.1                                         | 38.7                | NA      | No             | No              | never            | Positive   |
|       | adult19  | monoBnk-P              | 0/28   | 43  | Female | 15/12/11       | Yes              | No                                | AL & PQ             | 11290               | Yes   | 37               | 7               | 6.7                                         | 27.9                | NA      | Yes            | No              | never            | Positive   |
|       | adult20  | monoBnk-P              | 0/28   | 24  | Male   | 24/12/11       | No               | NA                                | ART & AL            | 8321                | Yes   | 39.1             | 8               | 5.3                                         | 35.4                | NA      | No             | No              | never            | Positive   |
|       | adult21  | monoBnk-P              | 0/28   | 38  | Female | 9/01/12        | No               | NA                                | AL                  | 6254                | Yes   | 39.9             | 2               | 5.3                                         | 38.8                | NA      | Yes            | No              | always           | Positive   |
|       | adult22  | monoBnk-P              | 0/28   | 28  | Male   | 14/02/12       | No               | NA                                | ART & AL            | 17208               | Yes   | 39               | 7               | 7.2                                         | 38.8                | NA      | Yes            | No              | never            | Positive   |
|       | adult23  | monoBnk-P              | 0/28   | 23  | Male   | 6/03/12        | No               | NA                                | ART & AL            | 23868               | Yes   | 37.6             | 10              | 5.1                                         | 29.1                | No      | Yes            | No              | always           | Positive   |
|       | adult24  | monoBnk-P              | 0/28   | 54  | Female | 22/03/12       | No               | NA                                | ART & AL            | 3317                | Yes   | 37.5             | 3               | 9.9                                         | 29.5                | NA      | Yes            | No              | never            | Positive   |
|       | adult25  | gdbnk-P                | 28     | 16  | Male   | 2/06/12        | Yes              | No                                | AL & CQ & PQ        | NA                  | NA    | NA               | NA              | NA                                          | NA                  | NA      | NA             | NA              | never            | Positive   |
|       | adult26  | gdbnk-P                | 28     | 21  | Female | 9/08/12        | Yes              | No                                | ART & AL & PQ       | NA                  | NA    | NA               | NA              | NA                                          | NA                  | NA      | NA             | NA              | never            | Positive   |
|       | adult27  | monoBnk-P              | 0/28   | 52  | Male   | 7/09/12        | Yes              | No                                | ART & AL            | 7563                | Yes   | 36.4             | 3               | 5.5                                         | 39.2                | NA      | No             | No              | never            | Positive   |
|       | adult28  | monoBnk-P              | 0/28   | 30  | Male   | 3/12/12        | No               | NA                                | AL                  | 5600                | Yes   | 37.8             | 9               | 6.4                                         | 37.3                | NA      | No             | No              | never            | Positive   |
|       | adult29  | gdbnk-P,CD4-P          | 0/28   | 54  | F      | 30/6/11        | No               | NA                                | ASMQ                | 10251               | Yes   | 38.2             | 3               | 5.1                                         | 34.8                | No      | No             | No              | always           | Positive   |
|       | adult30  | gdbnk-P,CD4-P          | 0/28   | 33  | M      | 18/11/11       | No               | NA                                | AL                  | 633                 | Yes   | 37.4             | 1               | 5.5                                         | 39.8                | NA      | Yes            | No              | never            | Positive   |
|       | adult31  | gdbnk-P,CD4-P          | 0/28   | 38  | M      | 30/12/11       | No               | NA                                | ART & AL            | 295                 | Yes   | 37.1             | 3               | 7.4                                         | 50.3                | NA      | Yes            | No              | never            | Positive   |
|       | adult32  | gdbnk-P,CD4-P          | 0/28   | 18  | M      | 9/2/12         | No               | NA                                | ART & AL            | 18676               | Yes   | 38.6             | 6               | 9.2                                         | 41                  | No      | Yes            | Yes             | never            | Positive   |
|       | adult33  | gdbnk-P,CD4-P          | 0/28   | 54  | F      | 30/6/11        | No               | NA                                | ASMQ                | 10251               | Yes   | 38.2             | 3               | 5.1                                         | 34.8                | No      | No             | No              | always           | Positive   |
|       | adult34  | gdbnk-P,CD4-P          | 0/28   | 49  | F      | 13/3/12        | No               | NA                                | AL                  | 1988                | Yes   | 38.1             | 6               | 5.3                                         | 27.5                | NA      | No             | No              | sometimes        | Positive   |
|       | adult35  | gdbnk-P,CD4-P          | 0/28   | 60  | F      | 28/5/12        | No               | NA                                | ART & AL            | 7816                | Yes   | 37.6             | 2               | 7.7                                         | 44.8                | No      | Yes            | No              | never            | Positive   |
|       | adult36  | gdbnk-P,CD4-P          | 0/28   | 22  | M      | 6/6/11         | No               | NA                                | ASMQ                | 13633               | Yes   | 37.2             | 5               | 4.1                                         | 15.9                | No      | No             | No              | never            | Positive   |
|       | adult37  | gdbnk-P,CD4-P          | 28     | 59  | M      | 14/5/11        | No               | NA                                | AL                  | NA                  | NA    | NA               | NA              | NA                                          | NA                  | NA      | NA             | NA              | always           | Positive   |

Characteristics of child and adult patients from malaria-endemic Sabah enrolled and treated at hospital sites, and additional healthy, uninfected malaria-endemic controls. Samples were used in assays including 10X scRNA-seq of whole PBMC (scRNAseq, Fig. 1-6, S1-3, S5, S6, S11-14 and S19-21), *ex vivo* cytokine capture assay of myeloid, B and NK cells (monoBnk-P, Fig. 2 & 6, S4, S7, S22 and S23), *ex vivo* surface phenotyping of  $\gamma\delta$  T cells (gdbnk-P), B cells (gdbnk-P), NK cells (gdbnk-P) and CD4 T cells (CD4-P). Previous malaria is self-reported. Abbreviations: UM= Uncomplicated malaria, ASMQ = artesunate-mefloquine, ART = intravenous artesunate, AL = artemether-lumefantrine, PQ = primaquine, CQ= chloroquine, QEH = Queen Elizabeth Hospital, Kota Kinabalu.

**Supplementary Table 2: Cell contributions to each PBMC subset by individual**

|                        | Day 0       |        |        |        |        |        | Day 7  |              |        |        |        |        | Day 28 |        |              |        |        |        | Control |         |        |         |         |
|------------------------|-------------|--------|--------|--------|--------|--------|--------|--------------|--------|--------|--------|--------|--------|--------|--------------|--------|--------|--------|---------|---------|--------|---------|---------|
|                        | Total       | child1 | child2 | child3 | adult1 | adult2 | adult3 | Total        | child1 | child2 | child3 | adult1 | adult2 | adult3 | Total        | child1 | child2 | child3 | adult1  | adult2d | adult3 | adultc1 | adultc2 |
| CD14 Monocytes         | <b>729</b>  |        | 54     | 48     | 2      | 619    | 6      | <b>1431</b>  | 289    | 38     | 34     | 895    | 96     | 79     | <b>923</b>   | 430    | 41     | 109    | 101     | 25      | 217    | 2599    | 894     |
| CD16 Monocytes         | <b>95</b>   |        | 6      | 4      | 1      | 84     | 0      | <b>248</b>   | 68     | 2      | 8      | 121    | 16     | 33     | <b>229</b>   | 104    | 0      | 10     | 46      | 20      | 49     | 477     | 353     |
| cDCs                   | <b>27</b>   |        | 0      | 1      | 0      | 26     | 0      | <b>72</b>    | 20     | 0      | 2      | 26     | 10     | 14     | <b>62</b>    | 24     | 0      | 18     | 1       | 1       | 18     | 155     | 79      |
| pDCs                   | <b>54</b>   |        | 15     | 8      | 0      | 27     | 4      | <b>81</b>    | 3      | 7      | 12     | 31     | 4      | 24     | <b>100</b>   | 46     | 27     | 4      | 3       | 11      | 9      | 71      | 62      |
| CD4 T cells            | <b>9132</b> |        | 3685   | 1599   | 1226   | 1342   | 1280   | <b>15330</b> | 798    | 4162   | 2696   | 1320   | 2986   | 3368   | <b>14734</b> | 2437   | 3153   | 2470   | 1916    | 2246    | 2512   | 1868    | 3542    |
| CD8 T cells            | <b>2965</b> |        | 1323   | 312    | 679    | 378    | 273    | <b>6816</b>  | 483    | 1422   | 1445   | 956    | 1301   | 1209   | <b>7422</b>  | 1403   | 1198   | 1280   | 1375    | 780     | 1386   | 1708    | 1640    |
| $\gamma\delta$ T cells | <b>871</b>  |        | 409    | 71     | 145    | 111    | 135    | <b>2271</b>  | 155    | 458    | 327    | 350    | 552    | 429    | <b>2881</b>  | 423    | 561    | 388    | 422     | 363     | 724    | 824     | 330     |
| NKT cells              | <b>57</b>   |        | 5      | 1      | 49     | 1      | 1      | <b>269</b>   | 9      | 22     | 3      | 55     | 134    | 46     | <b>466</b>   | 135    | 25     | 53     | 132     | 64      | 57     | 278     | 98      |
| NK cells               | <b>987</b>  |        | 315    | 124    | 395    | 95     | 58     | <b>4719</b>  | 303    | 931    | 540    | 1161   | 1074   | 710    | <b>4117</b>  | 898    | 297    | 364    | 1110    | 567     | 881    | 3028    | 1093    |
| B cells                | <b>623</b>  |        | 220    | 35     | 180    | 159    | 29     | <b>2767</b>  | 373    | 504    | 311    | 347    | 743    | 489    | <b>2515</b>  | 888    | 213    | 415    | 368     | 241     | 390    | 518     | 833     |
| Plasmablasts           | <b>124</b>  |        | 49     | 8      | 22     | 40     | 5      | <b>191</b>   | 4      | 44     | 26     | 18     | 77     | 22     | <b>241</b>   | 34     | 133    | 17     | 29      | 11      | 17     | 40      | 15      |
| Proliferating cells    | <b>163</b>  |        | 79     | 22     | 23     | 34     | 5      | <b>151</b>   | 18     | 29     | 33     | 21     | 27     | 23     | <b>119</b>   | 37     | 18     | 21     | 14      | 13      | 16     | 51      | 22      |
| HSPCs                  | <b>64</b>   |        | 40     | 13     | 7      | 3      | 1      | <b>134</b>   | 5      | 17     | 13     | 70     | 22     | 7      | <b>50</b>    | 18     | 16     | 2      | 4       | 3       | 7      | 15      | 3       |
| Platelets              | <b>7</b>    |        | 2      | 4      | 0      | 1      | 0      | <b>21</b>    | 5      | 1      | 0      | 4      | 4      | 7      | <b>13</b>    | 1      | 3      | 2      | 3       | 2       | 2      | 14      | 8       |
| Uncharacterised        | <b>294</b>  |        | 72     | 114    | 17     | 18     | 73     | <b>318</b>   | 20     | 89     | 60     | 60     | 36     | 53     | <b>414</b>   | 83     | 148    | 56     | 50      | 42      | 35     | 106     | 55      |

**Supplementary Table 3: Cell contributions to each NK cell subset by individual**

|                         | Day 0      |        |        |        |        |        |        | Day 7       |        |        |        |        |        |        | Day 28      |        |        |        |        |         |        | Control |         |
|-------------------------|------------|--------|--------|--------|--------|--------|--------|-------------|--------|--------|--------|--------|--------|--------|-------------|--------|--------|--------|--------|---------|--------|---------|---------|
|                         | Total      | child1 | child2 | child3 | adult1 | adult2 | adult3 | Total       | child1 | child2 | child3 | adult1 | adult2 | adult3 | Total       | child1 | child2 | child3 | adult1 | adult2d | adult3 | adultc1 | adultc2 |
| CD56++                  | <b>85</b>  |        | 33     | 6      | 38     | 8      | 0      | <b>395</b>  | 35     | 93     | 64     | 86     | 81     | 36     | <b>330</b>  | 117    | 25     | 33     | 68     | 40      | 47     | 231     | 106     |
| IFN $\gamma$ - Adaptive | <b>439</b> |        | 147    | 67     | 139    | 50     | 36     | <b>2144</b> | 111    | 361    | 201    | 491    | 609    | 371    | <b>1984</b> | 320    | 151    | 157    | 568    | 356     | 432    | 1625    | 611     |
| IFN $\gamma$ + Adaptive | <b>161</b> |        | 43     | 31     | 63     | 12     | 12     | <b>607</b>  | 26     | 135    | 65     | 150    | 147    | 84     | <b>527</b>  | 62     | 59     | 66     | 122    | 89      | 129    | 272     | 76      |
| PD1+                    | <b>37</b>  |        | 3      | 0      | 31     | 0      | 3      | <b>423</b>  | 44     | 112    | 43     | 78     | 54     | 92     | <b>261</b>  | 39     | 11     | 11     | 66     | 11      | 123    | 31      | 4       |
| Transitional            | <b>248</b> |        | 82     | 16     | 122    | 22     | 6      | <b>1084</b> | 84     | 221    | 157    | 350    | 155    | 117    | <b>780</b>  | 173    | 44     | 84     | 271    | 64      | 144    | 808     | 281     |

**Supplementary Table 4: Cell contributions to each  $\gamma\delta$  cell subset by individual**

|              | Day 0      |        |        |        |        |        |        | Day 7      |        |        |        |        |        |        | Day 28     |        |        |        |        |         |        | Control |         |
|--------------|------------|--------|--------|--------|--------|--------|--------|------------|--------|--------|--------|--------|--------|--------|------------|--------|--------|--------|--------|---------|--------|---------|---------|
|              | Total      | child1 | child2 | child3 | adult1 | adult2 | adult3 | Total      | child1 | child2 | child3 | adult1 | adult2 | adult3 | Total      | child1 | child2 | child3 | adult1 | adult2d | adult3 | adult1c | adult2c |
| APC          | <b>55</b>  |        | 38     | 5      | 2      | 4      | 6      | <b>103</b> | 4      | 37     | 20     | 7      | 24     | 11     | <b>185</b> | 18     | 24     | 22     | 37     | 22      | 62     | 36      | 16      |
| Cytotoxic    | <b>137</b> |        | 71     | 9      | 33     | 11     | 13     | <b>537</b> | 48     | 93     | 82     | 108    | 150    | 56     | <b>684</b> | 111    | 96     | 111    | 129    | 114     | 123    | 411     | 68      |
| Inflammatory | <b>100</b> |        | 55     | 2      | 26     | 12     | 5      | <b>248</b> | 10     | 67     | 39     | 36     | 65     | 31     | <b>337</b> | 34     | 91     | 64     | 41     | 57      | 50     | 65      | 30      |
| Naïve        | <b>180</b> |        | 81     | 23     | 16     | 19     | 41     | <b>343</b> | 12     | 83     | 61     | 21     | 43     | 123    | <b>555</b> | 52     | 67     | 69     | 46     | 47      | 274    | 64      | 86      |
| Transitional | <b>83</b>  |        | 43     | 3      | 20     | 9      | 8      | <b>334</b> | 18     | 45     | 51     | 72     | 96     | 52     | <b>261</b> | 38     | 56     | 34     | 36     | 43      | 54     | 55      | 31      |
| Type3        | <b>292</b> |        | 119    | 27     | 32     | 54     | 60     | <b>658</b> | 55     | 127    | 71     | 82     | 169    | 154    | <b>762</b> | 127    | 221    | 87     | 92     | 78      | 157    | 133     | 83      |



**Supplementary Table 5: Cell contributions to each CD4 cell subset by individual**

|           | Day 0       |        |        |        |        |        |        | Day 7       |        |        |        |        |        |        | Day 28      |        |        |        |        |         |        | Control |         |
|-----------|-------------|--------|--------|--------|--------|--------|--------|-------------|--------|--------|--------|--------|--------|--------|-------------|--------|--------|--------|--------|---------|--------|---------|---------|
|           | Total       | child1 | child2 | child3 | adult1 | adult2 | adult3 | Total       | child1 | child2 | child3 | adult1 | adult2 | adult3 | Total       | child1 | child2 | child3 | adult1 | adult2d | adult3 | adult1c | adult2c |
| Activated | <b>2381</b> |        | 1092   | 527    | 283    | 198    | 281    | <b>3212</b> | 173    | 1060   | 667    | 229    | 510    | 573    | <b>3180</b> | 513    | 948    | 543    | 356    | 430     | 390    | 273     | 755     |
| Naïve     | <b>2924</b> |        | 1296   | 568    | 296    | 347    | 417    | <b>5354</b> | 265    | 1751   | 932    | 353    | 913    | 1140   | <b>4839</b> | 808    | 1077   | 861    | 536    | 744     | 813    | 355     | 948     |
| T-reg     | <b>172</b>  |        | 88     | 32     | 12     | 27     | 13     | <b>275</b>  | 19     | 46     | 97     | 26     | 51     | 36     | <b>310</b>  | 68     | 58     | 55     | 35     | 59      | 35     | 44      | 96      |
| Tf-reg    | <b>329</b>  |        | 112    | 41     | 40     | 104    | 32     | <b>499</b>  | 31     | 80     | 86     | 73     | 106    | 123    | <b>472</b>  | 76     | 77     | 82     | 60     | 76      | 101    | 118     | 127     |
| Tfh       | <b>1473</b> |        | 453    | 181    | 265    | 339    | 235    | <b>2677</b> | 126    | 673    | 387    | 250    | 581    | 660    | <b>2744</b> | 432    | 514    | 380    | 441    | 484     | 493    | 439     | 721     |
| Th1       | <b>134</b>  |        | 59     | 6      | 24     | 32     | 13     | <b>295</b>  | 22     | 97     | 40     | 30     | 47     | 59     | <b>278</b>  | 63     | 34     | 48     | 41     | 38      | 54     | 32      | 31      |
| Th17      | <b>512</b>  |        | 122    | 94     | 84     | 92     | 120    | <b>917</b>  | 70     | 95     | 162    | 82     | 246    | 262    | <b>1016</b> | 236    | 121    | 181    | 134    | 126     | 218    | 273     | 425     |
| Th2       | <b>998</b>  |        | 368    | 140    | 174    | 161    | 155    | <b>1778</b> | 78     | 315    | 288    | 210    | 419    | 468    | <b>1704</b> | 206    | 309    | 298    | 252    | 264     | 375    | 319     | 427     |
| Tr1       | <b>209</b>  |        | 95     | 10     | 48     | 42     | 14     | <b>323</b>  | 14     | 45     | 37     | 67     | 113    | 47     | <b>191</b>  | 35     | 15     | 22     | 61     | 25      | 33     | 15      | 12      |

**Supplementary Table 6: Cell contributions to each CD8 cell subset by individual**

|                      | <b>Total</b> | child1 | child2 | child3 | adult1 | adult2 | adult3 | <b>Total</b> | child1 | child2 | child3 | adult1 | adult2 | adult3 | <b>Total</b> | child1 | child2 | child3 | adult1 | adult2 | adult3 | <b>Total</b> | adultc1 | adultc2 |
|----------------------|--------------|--------|--------|--------|--------|--------|--------|--------------|--------|--------|--------|--------|--------|--------|--------------|--------|--------|--------|--------|--------|--------|--------------|---------|---------|
| Cytotoxic Effector   | <b>429</b>   |        | 136    | 44     | 174    | 41     | 34     | <b>1495</b>  | 107    | 219    | 228    | 382    | 282    | 277    | <b>1700</b>  | 297    | 184    | 199    | 426    | 167    | 427    | <b>1211</b>  | 824     | 387     |
| Effector Memory      | <b>405</b>   |        | 109    | 51     | 112    | 65     | 68     | <b>1302</b>  | 62     | 215    | 184    | 226    | 271    | 344    | <b>1461</b>  | 115    | 130    | 159    | 384    | 185    | 488    | <b>697</b>   | 313     | 384     |
| Memory progenitor    | <b>464</b>   |        | 293    | 38     | 45     | 45     | 43     | <b>758</b>   | 64     | 168    | 138    | 68     | 167    | 153    | <b>881</b>   | 173    | 255    | 127    | 108    | 80     | 138    | <b>218</b>   | 80      | 138     |
| Naive/Central Memory | <b>1567</b>  |        | 775    | 179    | 262    | 224    | 127    | <b>3169</b>  | 230    | 816    | 893    | 237    | 562    | 431    | <b>3176</b>  | 729    | 627    | 790    | 362    | 336    | 332    | <b>1024</b>  | 401     | 623     |



**Supplementary Table 8: Antibodies for *ex vivo* cell phenotyping comparison of scRNAseq samples**

| Target             | Fluorochrome | Clone  | Manufacturer | Catalogue number | Dilution |
|--------------------|--------------|--------|--------------|------------------|----------|
| Surface Staining   |              |        |              |                  |          |
| CD16               | BUV395       | 3G8    | BD           | 563785           | 1/500    |
| CD45RA             | BUV563       | HI100  | BD           | 565702           | 1/1000   |
| CD4                | BUV737       | SK3    | BD           | 612748           | 1/250    |
| CD27               | BV421        | M-T271 | BD           | 562513           | 1/250    |
| CD123              | PacBlue      | 6H6    | Biologend    | 306043           | 1/50     |
| CD56               | BV510        | HCD56  | Biologend    | 318340           | 1/50     |
| CD127              | BV570        | A019D5 | Biologend    | 351307           | 1/80     |
| CD11c              | BV650        | Bu15   | Biologend    | 337238           | 1/500    |
| CD8                | BV711        | RPA-T8 | BD           | 563677           | 1/1000   |
| CD19               | BV750        | HIB19  | Biologend    | 302261           | 1/500    |
| HLA-DR             | BV785        | L243   | Biologend    | 307642           | 1/250    |
| TCR $\gamma\delta$ | FITC         | B1     | Biologend    | 331208           | 1/50     |
| CD3                | AF532        | UCHT1  | Invitrogen   | 58-0038-42       | 1/50     |
| CD14               | PerCP-Cy5.5  | M5E2   | Biologend    | 301824           | 1/100    |
| ICOS               | PE           | DX29   | BD           | 557802           | 1/100    |
| CD86               | PE-Daz594    | IT2.2  | Biologend    | 305434           | 1/250    |
| CXCR5              | PE-Cy7       | J252D4 | Biologend    | 356924           | 1/250    |
| CD38               | AF647        | HIT2   | Biologend    | 303514           | 1/500    |
| CD25               | APC-R700     | 2A3    | BD           | 565106           | 1/250    |
| V $\delta$ 2       | APC/Fire 750 | B6     | Biologend    | 331420           | 1/500    |

**Supplementary Table 9: Antibodies for *ex vivo* cytokine analysis**

| <b>Antibody</b>        | <b>Fluorochrome</b> | <b>Clone</b> | <b>Manufacturer</b> | <b>Catalogue number</b> | <b>Dilution</b> |
|------------------------|---------------------|--------------|---------------------|-------------------------|-----------------|
| Surface staining       |                     |              |                     |                         |                 |
| CD19                   | BUV496              | SJ25C1       | BD                  | 612938                  | 1/100           |
| CD64                   | BUV737              | 10.1         | BD                  | 564425                  | 1/50            |
| CD14                   | BUV805              | M5E2         | BD                  | 612902                  | 1/50            |
| CD86                   | BV480               | 2331         | BD                  | 566131                  | 1/50            |
| CD3                    | BB515               | UCHT1        | BD                  | 564466                  | 1/100           |
| CD56                   | BV510               | HCD56        | Biologend           | 318340                  | 1/50            |
| CD33                   | BV570               | WM53         | Biologend           | 303417                  | 1/50            |
| CD123                  | BV605               | 6H6          | Biologend           | 306026                  | 1/100           |
| CD11c                  | BV650               | B915         | Biologend           | 117310                  | 1/200           |
| HLA-DR                 | BV785               | L243         | Biologend           | 307642                  | 1/100           |
| CCR2                   | PerCPCy5.5          | K036C2       | Biologend           | 357204                  | 1/50            |
| V $\delta$ 2           | APC                 | B6           | Biologend           | 331418                  | 1/50            |
| CD16                   | AF700               | 3C78         | Biologend           | 302026                  | 1/100           |
| CD1c                   | APC-FIRE            | L161         | Biologend           | 331545                  | 1/30            |
| Intracellular staining |                     |              |                     |                         |                 |
| Live/Dead              | -                   | -            | Invitrogen          | L23105                  | 1/5000          |
| IFN- $\gamma$          | BUV395              | B27          | BD                  | 563563                  | 1/25            |
| IL-6                   | BV421               | C8-6         | BD                  | 501119                  | 1/100           |
| IL-4                   | BV711               | MD4-25D2     | BD                  | 564112                  | 1/25            |
| TNF                    | BV750               | Mab11        | BD                  | 566359                  | 1/100           |
| IL-12                  | AF647               | 503-F7       | BD                  | 565023                  | 1/25            |
| IL-10                  | PE-Dazzle           | JES-19F1     | BD                  | 506812                  | 1/25            |
| MCP-1                  | PE-Cy7              | 5D3-F7       | Biologend           | 502614                  | 1/100           |
| IFN- $\alpha$          | PE                  | LT27-295     | Miltenyi            | 130-092-602             | 1/100           |
| IL-1 $\beta$           | FITC                | CRM56        | Invitrogen          | 11-7018-42              | 1/50            |

**Supplementary Table 10: Antibodies for  $\gamma\delta$  T, NK and B cell *ex vivo* phenotyping analysis**

| Antibody                                     | Fluorochrome | Clone        | Manufacturer | Catalogue number | Dilution  |
|----------------------------------------------|--------------|--------------|--------------|------------------|-----------|
| Surface staining                             |              |              |              |                  |           |
| CD366 (Tim-3)                                | BV605        | F38-2E2      | Biolegend    | 345017           | 1 in 25   |
| CD223 (LAG-3)                                | BV711        | 11C3C65      | Biolegend    | 369319           | 1 in 50   |
| CD27                                         | AF700        | M-T271       | BD           | 560611           | 1 in 100  |
| V $\delta$ 1                                 | APC          | TS8.2        | Invitrogen   | 17-5679-42       | 1 in 200  |
| V $\delta$ 2                                 | APC-Fire     | B6           | Biolegend    | 331420           | 1 in 100  |
| CD19                                         | BUV395       | SJ25C1       | BD           | 563549           | 1 in 100  |
| CD56                                         | BUV563       | NCAM16.2     | BD           | 612928           | 1 in 500  |
| CD279 (PD1)                                  | BUV615       | EH12.1       | BD           | 612991           | 1 in 50   |
| CD16                                         | BUV737       | 3G8          | BD           | 612787           | 1 in 500  |
| CD3                                          | BUV805       | SK7          | BD           | 612893           | 1 in 200  |
| CD57                                         | BV421        | NK-1         | BD           | 563896           | 1 in 500  |
| CD38                                         | BV480        | HIT2         | BD           | 566137           | 1 in 500  |
| CD86                                         | BV510        | 2331 (FUN-1) | BD           | 563461           | 1 in 100  |
| CD14                                         | BV570        | M5E2         | Biolegend    | 301831           | 1 in 50   |
| CD278 (ICOS)                                 | BV650        | DX29         | BD           | 563832           | 1 in 50   |
| HLA-DR                                       | BV750        | L243         | Biolegend    | 307672           | 1 in 200  |
| IgD                                          | BV785        | IA6-2        | Biolegend    | 348242           | 1 in 200  |
| CD98                                         | FITC         | MEM-108      | Biolegend    | 315603           | 1 in 50   |
| Intracellular staining                       |              |              |              |                  |           |
| LIVE/DEAD<br>Fixable Blue<br>Dead Cell Stain | -            | -            | Invitrogen   | L23105           | 1 in 2500 |
| Perforin                                     | PE-CF594     | $\delta$ G9  | BD           | 563763           | 1 in 5000 |
| Granzyme-B                                   | PerCP-Cy5.5  | QA16A02      | Biolegend    | 372212           | 1 in 500  |

**Supplementary Table 11: Antibodies for CD4 *ex vivo* phenotyping analysis**

| Antigen                                   | Fluorophore | Clone          | Manufacturer | Cat #      | Concentrations |
|-------------------------------------------|-------------|----------------|--------------|------------|----------------|
| Surface staining                          |             |                |              |            |                |
| LAG3                                      | BV421       | 11C3C65        | Biologend    | 369314     | 1 in 50        |
| CD49b                                     | FITC        | eBloY41B(Y418) | Invitrogen   | 11-0498-42 | 1 in 100       |
| CCR7                                      | PerCP-Cy5.5 | 150503         | BD           | 561144     | 1 in 25        |
| CD14                                      | BUV395      | MΦP9           | BD           | 563561     | 1 in 100       |
| CD19                                      | BUV395      | SJ25C1         | BD           | 563549     | 1 in 100       |
| CD8                                       | BUV496      | RPA-T8         | BD           | 612942     | 1 in 400       |
| CD3                                       | BUV805      | SK7            | BD           | 612893     | 1 in 50        |
| CD38                                      | BV480       | HIT2           | BD           | 566137     | 1 in 50        |
| CD127                                     | BV570       | A019D5         | Biologend    | 351308     | 1 in 50        |
| CCR6                                      | BV650       | 11A9           | BD           | 563922     | 1 in 50        |
| CXCR5                                     | BV711       | J252D4         | Biologend    | 356934     | 1 in 50        |
| TIM3                                      | BV750       | F38-2E2        | Biologend    | 345056     | 1 in 50        |
| CD4                                       | BV785       | OKT4           | Biologend    | 317442     | 1 in 50        |
| CD120b                                    | PE          | 3G7A02         | Biologend    | 358404     | 1 in 50        |
| CXCR3                                     | PE-DAZ594   | 1C6/CXCR3      | BD           | 562451     | 1 in 50        |
| PD1                                       | PE-CY7      | EH12.1         | BD           | 561272     | 1 in 50        |
| ICOS                                      | APC-CY7     | C398.4A        | Biologend    | 313530     | 1 in 25        |
| Intracellular staining                    |             |                |              |            |                |
| CTLA4                                     | BV605       | BNI3           | Biologend    | 369610     | 1 in 50        |
| FOXP3                                     | AF647       | 206D           | Biologend    | 320114     | 1 in 50        |
| LIVE/DEAD Fixable Blue<br>Dead Cell Stain |             |                | Invitrogen   | L23105     | 1 in 2500      |
